# Supplementary material for: Cell type-specific over-expression of chromosome 21 genes in fibroblasts and fetal hearts with trisomy 21
Source: PubMed Central journal article supplement (PMC1435874; doi:10.1186/1471-2350-7-24), 2006-03-15
Supplement: 1471-2350-7-24-S1.pdf [file 1471-2350-7-24-S1.pdf]

| <b>Supplemental Table 1. Genes over- or under-expressed in early passage fibroblasts with +21. ANOVA, p&lt;.05.</b> |                   |                 |                 |                                                                                                                                   |                      |                        |
|---------------------------------------------------------------------------------------------------------------------|-------------------|-----------------|-----------------|-----------------------------------------------------------------------------------------------------------------------------------|----------------------|------------------------|
| <b>Affy ID</b>                                                                                                      | <b>Synonyms</b>   | <b>Symbol</b>   | <b>Genbank</b>  | <b>Description</b>                                                                                                                | <b>Chromosome</b>    | <b>Fold difference</b> |
| 41585_at                                                                                                            | KIAA0746          | KIAA0746        | AB018289        | KIAA0746 protein                                                                                                                  | 4p15.2               | 5.21                   |
| 36873_at                                                                                                            | VLDLR             | VLDLR           | D16532          | Very low density lipoprotein receptor                                                                                             | 9p24                 | 3.63                   |
| 1616_at                                                                                                             | FGF-9             | FGF9            | D14838          | Fibroblast growth factor 9                                                                                                        | 13q11-q12            | 3.30                   |
| <b>36040_at</b>                                                                                                     | <b>SH3BGR</b>     | <b>SH3BGR</b>   | <b>AI337192</b> | <b>SH3 domain binding glutamic acid-rich protein</b>                                                                              | <b>21q22.3</b>       | <b>3.10</b>            |
| 34348_at                                                                                                            | SPINT2            | SPINT2          | U78095          | Serine protease inhibitor, Kunitz type, 2                                                                                         | 19q13.1              | 2.93                   |
| <b>37014_at</b>                                                                                                     | <b>MX1</b>        | <b>MX1</b>      | <b>M33882</b>   | <b>Myxovirus (influenza virus) resistance 1, interferon-inducible protein p78</b>                                                 | <b>21q22.3</b>       | <b>2.70</b>            |
| 1767_s_at                                                                                                           | TGF-beta 3        | TGFB3           | X14885          | Transforming growth factor-beta 3                                                                                                 | 14q24                | 2.67                   |
| <b>35714_at</b>                                                                                                     | <b>PDXK</b>       | <b>PDXK</b>     | <b>U89606</b>   | <b>Pyridoxal (pyridoxine, vitamin B6) kinase</b>                                                                                  | <b>21q22.3</b>       | <b>2.43</b>            |
| <b>38384_at</b>                                                                                                     | <b>GART</b>       | <b>GART</b>     | <b>X54199</b>   | <b>Phosphoribosylglycinamide formyltransferase, phosphoribosylglycinamide synthetase, phosphoribosylaminoimidazole synthetase</b> | <b>21q22.11</b>      | <b>2.27</b>            |
| <b>38474_at</b>                                                                                                     | <b>CBS</b>        | <b>CBS</b>      | <b>L00972</b>   | <b>Cystathionine-beta-synthase</b>                                                                                                | <b>21q22.3</b>       | <b>2.24</b>            |
| 34542_at                                                                                                            | gapdh-2           | GAPDS           | AJ005371        | Glyceraldehyde-3-phosphate dehydrogenase, spermatogenic                                                                           | 19q13.1              | 2.21                   |
| 40009_at                                                                                                            | FMR2              | FMR2            | U48436          | Fragile X mental retardation 2                                                                                                    | Xq28                 | 2.19                   |
| <b>37555_at</b>                                                                                                     | <b>PWP2</b>       | <b>PWP2H</b>    | <b>X95263</b>   | <b>periodic tryptophan protein homolog</b>                                                                                        | <b>21q22.3</b>       | <b>2.01</b>            |
| 35305_at                                                                                                            | XPNPEPL           | XPNPEP1         | X95762          | X-prolyl aminopeptidase 1, soluble                                                                                                | 10q25.3              | 2.00                   |
| 39366_at                                                                                                            | PPP1R3C           | PPP1R3C         | N36638          | Protein phosphatase 1, regulatory (inhibitor) subunit 3C                                                                          | 10q23-q24            | 1.99                   |
| 31840_at                                                                                                            | IDE               | IDE             | M21188          | Insulin-degrading enzyme                                                                                                          | 10q23-q25            | 1.98                   |
| 39420_at                                                                                                            | TLS/CHOP          | DDIT3           | S62138          | DNA-damage-inducible transcript 3                                                                                                 | 12q13.1-q13.2        | 1.81                   |
| 39219_at                                                                                                            | CEBPG             | CEBPG           | U20240          | CCAAT/enhancer binding protein (C/EBP), gamma                                                                                     | 19q13.11             | 1.79                   |
| <b>34994_at</b>                                                                                                     | <b>N143</b>       | <b>WDR9</b>     | <b>AJ002572</b> | <b>Chromosome 21 open reading frame 107</b>                                                                                       | <b>21q22.2</b>       | <b>1.78</b>            |
| <b>36088_at</b>                                                                                                     | <b>c21-Irp</b>    | <b>DSCR2</b>    | <b>AJ006291</b> | <b>Down syndrome critical region gene 2</b>                                                                                       | <b>21q22.3</b>       | <b>1.74</b>            |
| 37188_at                                                                                                            | PCK2              | PCK2            | X92720          | Phosphoenolpyruvate carboxykinase 2 (mitochondrial)                                                                               | 14q11.2              | 1.73                   |
| 34849_at                                                                                                            | serS              | SARS            | X91257          | Seryl-tRNA synthetase                                                                                                             | 1p13.3-p13.1         | 1.73                   |
| 37032_at                                                                                                            | NNMT              | NNMT            | U08021          | Nicotinamide N-methyltransferase                                                                                                  | 11q23.1              | 1.71                   |
| <b>39767_at</b>                                                                                                     | <b>KIAA0002</b>   | <b>CCT8</b>     | <b>D13627</b>   | <b>Chaperonin containing TCP1, subunit 8 (theta)</b>                                                                              | <b>21q22.11</b>      | <b>1.68</b>            |
| 34367_at                                                                                                            | PHGDH             | PHGDH           | AF006043        | A10; 3-phosphoglycerate dehydrogenase                                                                                             | 1p12                 | 1.66                   |
| 41252_s_at                                                                                                          | PLEKHB2           |                 | W28614          | Pleckstrin homology domain containing, family B (evectins) member 2                                                               | 2q21.1               | 1.66                   |
| 38977_at                                                                                                            | YARS              | YARS            | U89436          | Tyrosyl-tRNA synthetase                                                                                                           | 1p35.1               | 1.64                   |
| <b>31863_at</b>                                                                                                     | <b>KIAA0179</b>   | <b>KIAA0179</b> | <b>D80001</b>   | <b>KIAA0179</b>                                                                                                                   | <b>21q22.3</b>       | <b>1.60</b>            |
| 40782_at                                                                                                            | SDR1              | SDR1            | AF061741        | Dehydrogenase/reductase (SDR family) member 3                                                                                     | 1p36.1               | 1.57                   |
| 35844_at                                                                                                            | SDC4; SYN         | SDC4            | D79206          | Ryudocan core protein                                                                                                             | 20q12                | 1.57                   |
| <b>32236_at</b>                                                                                                     | <b>UBE2G2</b>     | <b>UBE2G2</b>   | <b>AF032456</b> | <b>Ubiquitin conjugating enzyme G2</b>                                                                                            | <b>21q22.3</b>       | <b>1.56</b>            |
| <b>35776_at</b>                                                                                                     | <b>ITSN1</b>      | <b>ITSN1</b>    | <b>AF064243</b> | <b>Intersectin 1 (SH3 domain protein)</b>                                                                                         | <b>21q22.1-q22.2</b> | <b>1.56</b>            |
| 34414_at                                                                                                            | KIAA0368          | KIAA0368        | AB002366        | KIAA0368                                                                                                                          | 9q31.3               | 1.54                   |
| <b>39348_at</b>                                                                                                     | <b>HRMT1L1</b>    | <b>HRMT1L1</b>  | <b>X99209</b>   | <b>HMT1 hnRNP methyltransferase-like 1</b>                                                                                        | <b>21q22.3</b>       | <b>1.53</b>            |
| <b>35816_at</b>                                                                                                     | <b>cystatin B</b> | <b>CSTB</b>     | <b>U46692</b>   | <b>EPM1 disease gene; protease inhibitor; cystatin B</b>                                                                          | <b>21q22.3</b>       | <b>1.53</b>            |
| 41509_at                                                                                                            | HSPA9B            | HSPA9B          | L11066          | Heat shock 70kDa protein 9B (mortalin-2)                                                                                          | 5q31.1               | 1.53                   |
| 35635_at                                                                                                            | LOC92249          | LOC92249        | AL080202        | Hypothetical protein LOC92249                                                                                                     | Xq11.2               | 1.52                   |
| 37243_at                                                                                                            | GUCY1B3           | GUCY1B3         | X66533          | Guanylate cyclase 1, soluble, beta 3                                                                                              | 4q31.3-q33           | 1.51                   |
| <b>40116_at</b>                                                                                                     | <b>PFKL</b>       | <b>PFKL</b>     | <b>X15573</b>   | <b>Phosphofructokinase, liver</b>                                                                                                 | <b>21q22.3</b>       | <b>1.51</b>            |
| 41246_at                                                                                                            | PN1               | SERPINE2        | AI743134        | Serine proteinase inhibitor; Proteinase nexin 1                                                                                   | 2q33-q35             | 1.48                   |
| 32229_at                                                                                                            | EIF4EL3           | EIF4EL3         | AF038957        | Eukaryotic translation initiation factor 4E-like 3                                                                                | 2q37.1               | 1.47                   |
| 32706_at                                                                                                            | HIRA              | HIRA            | X89887          | HIR histone cell cycle regulation defective homolog A                                                                             | 22q11.21             | 1.46                   |
| 41250_at                                                                                                            | JTV-1             | JTV1            | U24169          | JTV1 gene                                                                                                                         | 7p22                 | 1.46                   |
| 34709_r_at                                                                                                          | STAG2             | STAG2           | Z75331          | Nuclear protein SA-2.                                                                                                             | Xq25                 | 1.46                   |
| 38942_r_at                                                                                                          | AD024             | SPBC25          | W28610          | Kinetochore protein Spc25                                                                                                         | 2q24.3               | 1.45                   |
| 31497_at                                                                                                            | GAGE1             | GAGE1           | U19142          | G antigen 8                                                                                                                       | Xp11.4-p11.2         | 1.45                   |
| 34378_at                                                                                                            | ADFP              | ADFP            | X97324          | Adipose differentiation-related protein                                                                                           | 9p22.1               | 1.43                   |
| 35223_at                                                                                                            | AIBP63            | HPS5            | AB023234        | Hermansky-Pudlak 5, integrin binding protein                                                                                      | 11p14                | 1.41                   |
| <b>39003_at</b>                                                                                                     | <b>PTTG1IP</b>    | <b>PTTG1IP</b>  | <b>Z50022</b>   | <b>Pituitary tumor-transforming 1 interacting protein</b>                                                                         | <b>21q22.3</b>       | <b>1.40</b>            |
| 37825_at                                                                                                            | GK2               | GALK2           | M84443          | Galactokinase 2                                                                                                                   | 15q21.1              | 1.40                   |
| 41060_at                                                                                                            | CCNE1             | CCNE1           | M74093          | Cyclin E1                                                                                                                         | 19q12                | 1.40                   |
| 40959_at                                                                                                            | KIAA0599          | PLEKHG3         | AB011171        | Pleckstrin homology domain containing, family G                                                                                   | 14q23.3              | 1.38                   |
| 39800_s_at                                                                                                          | HAX1              | HAX1            | U68566          | HS1 binding protein                                                                                                               | 1q21.3               | 1.37                   |
| 36115_at                                                                                                            | clk3              | CLK3            | L29217          | CDC-like kinase 3                                                                                                                 | 15q24                | 1.36                   |
| 32738_at                                                                                                            | NDUFS2            | NDUFS2          | AF050640        | NADH dehydrogenase (ubiquinone) Fe-S protein 2                                                                                    | 1q23                 | 1.36                   |
| <b>36517_at</b>                                                                                                     | <b>U2AF1</b>      | <b>U2AF1</b>    | <b>M96982</b>   | <b>U2(RNU2) small nuclear RNA auxiliary factor 1</b>                                                                              | <b>21q22.3</b>       | <b>1.35</b>            |
| 37297_at                                                                                                            | LOC84549          | LOC84549        | AL049422        | RNA binding protein 13                                                                                                            | 8p12                 | 1.35                   |
| 40882_at                                                                                                            | iCE               | CES2            | Y09616          | Carboxylesterase 2 (intestine, liver)                                                                                             | 16q22.1              | 1.32                   |

| Affy ID    | Synonyms  | Symbol   | Genbank  | Description                                                                         | Chromosome   | Fold difference |
|------------|-----------|----------|----------|-------------------------------------------------------------------------------------|--------------|-----------------|
| 36083_at   | TSPAN31   | SAS      | U01160   | Sarcoma amplified sequence                                                          | 12q13.3      | 0.74            |
| 32856_at   | KIAA0819  | MICAL3   | AB020626 | Calponin and LIM domain containing 3                                                | 22q11.21     | 0.73            |
| 38670_at   | RNF114    | ZNF313   | AL031685 | Zinc finger protein 313                                                             | 20q13.13     | 0.71            |
| 38978_at   | PAIP1     | PAIP1    | AF013758 | Poly(A) binding protein interacting protein 1                                       | 5p12         | 0.70            |
| 33288_i_at | FPM315    | ZNF263   | D88827   | Zinc finger protein 263                                                             | 16p13.3      | 0.69            |
| 35363_at   | P72       | DDX17    | AL080113 | DEAD (Asp-Glu-Ala-Asp) box polypeptide 17                                           | 22q13.1      | 0.69            |
| 34355_at   | MeCP2     | MECP2    | AJ132917 | Methyl CpG binding protein 2 (Rett syndrome)                                        | Xq28         | 0.69            |
| 33749_at   | P53TG1    | TP53AP1  | AB007455 | TP53 activated protein 1                                                            | 7q21.1       | 0.68            |
| 34912_at   | DRP-1     | DAPK2    | AF052941 | Death-associated protein kinase 2                                                   | 15q22.31     | 0.68            |
| 34815_at   | TNRC12    | EP400    | U80743   | E1A binding protein p400                                                            | 12q24.33     | 0.66            |
| 41049_at   | HIRS-1    | IRS1     | S62539   | Insulin receptor substrate 1                                                        | 2q36         | 0.64            |
| 851_s_at   | HIRS-1    | IRS1     | S62539   | Insulin receptor substrate 1                                                        | 2q36         | 0.62            |
| 38982_at   | RAP1      | TERF2IP  | W28865   | Telomeric repeat binding factor 2, interacting protein                              | 16q23.1      | 0.62            |
| 1461_at    | MAD3      | NFKBIA   | M69043   | Nuclear factor of kappa light polypeptide gene enhancer in B-cells inhibitor, alpha | 14q13        | 0.62            |
| 1328_at    | RNF84     | TRAF5    | U69108   | TNF receptor-associated factor 5                                                    | 1q32         | 0.61            |
| 37221_at   | PRKAR2    | PRKAR2B  | M31158   | Protein kinase, cAMP-dependent, regulatory, type II, beta                           | 7q22         | 0.61            |
| 33002_at   | NCKbeta   | NCK2     | AF047487 | NCK adaptor protein 2                                                               | 2q12         | 0.60            |
| 38902_r_at | CRE-BP1   | ATF2     | X15875   | Activating transcription factor 2                                                   | 2q32         | 0.60            |
| 36544_at   | ARFL3     | ARL3     | AF038193 | ADP-ribosylation factor-like 3                                                      | 10q23.3      | 0.60            |
| 32506_at   | KIAA1108  | TBC1D1   | AB029031 | TBC1 (tre-2/USP6, BUB2, cdc16) domain family, member 1                              | 4p14         | 0.59            |
| 1325_at    | MADH1     | SMAD1    | U59423   | SMAD, mothers against DPP homolog 1                                                 | 4q31         | 0.58            |
| 40814_at   | IDS       | IDS      | L40586   | Iduronate 2-sulfatase (Hunter syndrome)                                             | Xq28         | 0.57            |
| 599_at     | HLX1      | HLX1     | M60721   | H2.0-like homeo box 1                                                               | 1q41-q42.1   | 0.57            |
| 33041_at   | CX45      | GJA7     | U03493   | Connexin 45, gap junctions protein                                                  | 17q21.31     | 0.51            |
| 40308_at   | KIAA1240  | KIAA1240 | AI830496 | KIAA1240 protein                                                                    | 2p24.1-p23.3 | 0.50            |
| 38066_at   | NQO1      | NQO1     | M81600   | NAD(P)H:quinone oxidoreductase                                                      | 16q22.1      | 0.49            |
| 38876_at   | DKFZp564L | ASB9     | AL080091 | Ankyrin repeat and SOCS box-containing 9                                            | X            | 0.44            |
| 37111_g_at | PFK2      | PFKFB3   | AB012229 | Fructose-6-phosphate,2-kinase/fructose-2, 6-bisphosphatase                          | 10p14-p15    | 0.43            |
| 1935_at    | MDMX      | MDM4     | AF007111 | Transformed 3T3 cell double minute 4                                                | 1q32         | 0.42            |
| 36655_at   | X104      | TJP2     | L27476   | Tight junction protein 2 (zona occludens 2)                                         | 9q13-q21     | 0.42            |
| 1169_at    | ME6       | PCDHGB7  | D88799   | Protocadherin gamma subfamily C, 3                                                  | 5q31         | 0.41            |
| 40303_at   | TFAP2C    | TFAP2C   | U85658   | Transcription factor AP-2 gamma                                                     | 20q13.2      | 0.38            |
| 39247_at   | ABCC6     | ABCC6    | U66689   | ATP-binding cassette, sub-family C (CFTR/MRP), member 6                             | 16p13.1      | 0.33            |
| 1788_s_at  | MKP-2     | DUSP4    | U48807   | Dual specificity phosphatase 4                                                      | 8p12-p11     | 0.32            |
| 41354_at   | STC       | STC1     | U25997   | Stanniocalcin 1                                                                     | 8p21-p11.2   | 0.20            |
