# Supplementary material for: Cell type-specific over-expression of chromosome 21 genes in fibroblasts and fetal hearts with trisomy 21
Source: PubMed Central journal article supplement (PMC1435874; doi:10.1186/1471-2350-7-24), 2006-03-15
Supplement: 1471-2350-7-24-S2.pdf [file 1471-2350-7-24-S2.pdf]

**Supplemental Table 2. Genes over- or under-expressed in late passage fibroblasts with +21. ANOVA, p<.05.**

| Affy ID    | Synonyms      | Symbol    | Genbank  | Description                                                                                                   | Chromosome     | fold difference |
|------------|---------------|-----------|----------|---------------------------------------------------------------------------------------------------------------|----------------|-----------------|
| 37014_at   | MX1           | MX1       | M33882   | Myxovirus (influenza virus) resistance 1, interferon-inducible protein p78                                    | 21q22.3        | 16.02           |
| 879_at     | MX2           | MX2       | M30818   | Myxovirus (influenza virus) resistance 2                                                                      | 21q22.3        | 4.10            |
| 35717_at   | KIAA0822      | ABCA8     | AB020629 | ATP-binding cassette, sub-family A (ABC1), member 8                                                           | 17q24          | 4.05            |
| 40698_at   | AICL          | CLEC2B    | X96719   | C-type (calcium dependent, carbohydrate-recognition domain) lectin, superfamily member 2 (activation-induced) | 12p13-p12      | 3.87            |
| 846_s_at   | Bak           | BAK1      | U16811   | BCL2-antagonist/killer 1                                                                                      | 6p21.3         | 3.85            |
| 32387_at   | LYPLA3        | LYPLA3    | AB017494 | Lysosomal phospholipase A2                                                                                    | 16q22.1        | 3.30            |
| 40850_at   | FKBP38        | FKBP8     | L37033   | FK506 binding protein 8, 38kDa                                                                                | 19p12          | 3.19            |
| 1616_at    | FGF-9         | FGF9      | D14838   | Fibroblast growth factor 9 (glia-activating factor)                                                           | 13q11-q12      | 2.64            |
| 34742_at   | bcl-xL        | BCL2L1    | Z23115   | BCL2-like 1                                                                                                   | 20q11.21       | 2.47            |
| 1834_at    | GPR           | GPR       | D38449   | Putative G protein coupled receptor                                                                           | 15q14-q15.1    | 2.45            |
| 35017_f_at | CDA12; D6S203 | HLA-J     | M80469   | MHC class I HLA-J                                                                                             | 6p21.31        | 2.43            |
| 37555_at   | PWP2          | PWP2H     | X95263   | PWP2 periodic tryptophan protein homolog                                                                      | 21q22.3        | 2.39            |
| 37111_g_at | PFK2          | PFKFB3    | AB012229 | Fructose-6-phosphate,2-kinase/fructose-2, 6-bisphosphatase                                                    | 10p14-p15      | 2.26            |
| 867_s_at   | THBS1         | THBS1     | U12471   | Thrombospondin 1                                                                                              | 15q15          | 2.18            |
| 36530_g_at | MGC2650       | MGC2650   | AI885381 | Hypothetical protein MGC2650                                                                                  | 19q13.32       | 2.17            |
| 922_at     | PPP2R1A       | PPP2R1A   | J02902   | Protein phosphatase 2A regulatory subunit alpha-isotype                                                       | 19q13.41       | 2.14            |
| 1615_at    | bcl-xL        | BCL2L1    | Z23115   | BCL2-like 1                                                                                                   | 20q11.21       | 2.10            |
| 33650_at   | DDX27         | DDX27     | W25911   | DEAD box polypeptide 27                                                                                       | 20q13.13       | 2.06            |
| 35284_f_at | FLJ10738      | C14orf114 | W28620   | Chromosome 14 open reading frame 114                                                                          | 14q24.1        | 2.03            |
| 32714_s_at | ACVRL1        | ACVRL1    | L17075   | Activin A receptor type II-like 1                                                                             | 12q11-q14      | 2.01            |
| 31927_s_at | KNP-I         | C21orf33  | D86062   | Chromosome 21 open reading frame 33                                                                           | 21q22.3        | 1.96            |
| 115_at     | THBS1         | THBS1     | X14787   | Thrombospondin 1                                                                                              | 15q15          | 1.95            |
| 35791_at   | MPDU1         | MPDU1     | AF038961 | Mannose-P-dolichol utilization defect 1                                                                       | 17p13.1-p12    | 1.92            |
| 37965_at   | PARVB         | PARVB     | AA181053 | Parvin, beta                                                                                                  | 22q13.2-q13.33 | 1.90            |
| 34157_f_at | H2AF1         | HIST1H2AL | AI200373 | Histone 1, H2al                                                                                               | 6p22-p21.3     | 1.90            |
| 612_s_at   | CNP           | CNP       | M19650   | 2',3'-cyclic nucleotide 3' phosphodiesterase                                                                  | 17q21          | 1.89            |
| 36841_at   | HNAACTE       | PTE1      | AA811338 | Peroxisomal acyl-CoA thioesterase                                                                             | 20q12-q13.1    | 1.85            |
| 33842_at   | FLJ11560      | KIAA1539  | AC004472 | KIAA1539; hypothetical protein LOC80256                                                                       | 9p13.3         | 1.82            |
| 844_at     | PPP1R1A       | PPP1R1A   | U48707   | Protein phosphatase 1, regulatory (inhibitor) subunit 1A                                                      | 12q13.2        | 1.82            |
| 1212_at    | GSTZ-1        | GSTZ1     | U86529   | Glutathione transferase zeta 1 (maleylacetoacetate isomerase)                                                 | 14q24.3        | 1.81            |
| 38434_at   | AAMP          | AAMP      | M95627   | Angio-associated, migratory cell protein                                                                      | 2q35           | 1.76            |
| 32420_at   | GPR6          | GPR6      | U18549   | Putative GPR6 G protein-coupled receptor, ligand unknown                                                      | 6q21           | 1.76            |
| 38819_at   | CCK4          | PTK7      | U33635   | PTK7 protein tyrosine kinase 7                                                                                | 6p21.1         | 1.75            |
| 33758_f_at | PSG13         | PSG11     | U25988   | Pregnancy specific beta-1-glycoprotein 11                                                                     | 19q13.2        | 1.73            |
| 31559_at   | NADC1         | SLC13A2   | U26209   | Solute carrier family 13 (sodium-dependent dicarboxylate transporter), member 2                               | 17p13.2        | 1.73            |
| 33214_at   | RPMS12        | MRPS12    | Y11681   | Ribosomal protein, mitochondrial, S12                                                                         | 19q13.1-q13.2  | 1.72            |
| 33011_at   | NTR2          | NTSR2     | Y10148   | Neurotensin receptor 2                                                                                        | 2p25.1         | 1.69            |
| 32980_f_at | HIST1H2BC     | H2BFL     | AI688098 | Histone 1, H2bc                                                                                               | 6p21.3         | 1.68            |
| 32811_at   | MYO1E         | MYO1C     | X98507   | Myosin-I beta; Myosin IC                                                                                      | 17p13          | 1.68            |
| 35598_at   | HIST1H3E      | H3FD      | AA904505 | Histone 1, H3e                                                                                                | 6p21.3         | 1.66            |
| 35091_at   | Don-1         | NRG2      | AA706226 | Neuregulin 2                                                                                                  | 5q23-q33       | 1.64            |
| 37421_f_at | HLAF          | HLA-F     | AL022723 | Major histocompatibility complex, class I, F                                                                  | 6p21.3         | 1.64            |
| 31523_f_at | H2B/h         | H2BFH     | Z80780   | H2B/h gene.                                                                                                   | 6p21.3         | 1.63            |
| 1751_g_at  |               |           | AD000092 | Chromosome 19p13.2 cosmids R31240, R30272 and R28549 containing the EKLf, GCDH, CRTc, and RAD23A genes        | 19p13.2        | 1.60            |
| 40336_at   | ADXR          | FDXR      | J03826   | Ferredoxin reductase                                                                                          | 17q24-q25      | 1.60            |
| 32866_at   | KIAA0605      | ADAMTSL2  | AB011177 | KIAA0605 gene product; ADAMTS-like 2                                                                          | 9q34.2         | 1.59            |
| 40370_f_at | MHC-G         | HLA-G     | M90683   | HLA-G histocompatibility antigen, class I, G                                                                  | 6p21.3         | 1.57            |
| 39640_at   | GFAT2         | GFPT2     | AB016789 | Glutamine-fructose-6-phosphate transaminase 2                                                                 | 5q34-q35       | 1.56            |
| 40649_at   | NEC1          | PCSK1     | X64810   | Proprotein convertase subtilisin/kexin type 1                                                                 | 5q15-q21       | 1.54            |
| 37490_at   | AE3           | SLC4A3    | L27213   | Solute carrier family 4, anion exchanger, member 3                                                            | 2q36           | 1.54            |
| 34999_at   | HVEC          | PVRL1     | AF060231 | Poliovirus receptor-related 1 (herpesvirus entry mediator C; nectin)                                          | 11q23          | 1.54            |
| 32474_at   | HUP1          | PAX7      | X96744   | Paired box gene 7                                                                                             | 1p36.2         | 1.51            |
| 32061_at   | FLJ10871      | FLJ10871  | U96629   | FLJ10871 protein                                                                                              | 16             | 1.50            |
| 36731_g_at | MRP7          | ABCC10    | U66684   | ATP-binding cassette, sub-family C (CFTR/MRP), member 10                                                      | 6p21.1         | 1.43            |
| 40369_f_at | MHC-G         | HLA-G     | AL022723 | HLA-G histocompatibility antigen, class I, G                                                                  | 6p21.3         | 1.43            |
| 34093_at   |               |           | AI829701 | IgH chain VDJC region                                                                                         | 4              | 1.43            |
| 32151_at   | Fug1          | RANGAP1   | X82260   | Ran GTPase activating protein 1                                                                               | 22q13.2        | 1.42            |
| 34260_at   | KIAA0683      | KIAA0683  | AB014583 | KIAA0683 gene product                                                                                         | 16p13.3        | 1.35            |
| 32082_at   | SENp5         | SENp5     | AL049229 | SUMO1/sentrin specific protease 5                                                                             | 3q29           | 0.73            |
| 33828_at   | BAF57         | SMARCE1   | AF035262 | SWI/SNF related, matrix associated, actin dependent regulator of chromatin, subfamily e, member 1 BAF57       | 17q21.2        | 0.72            |
| 35325_at   | FBP           | RAB14     | AF052113 | RAB14, member RAS oncogene family                                                                             | 9q32-q34.1     | 0.72            |
| 39555_at   | ING1L         | ING2      | AB012853 | Inhibitor of growth family, member 2; Inhibitor of growth family, member 1-like                               | 4q35.1         | 0.71            |
| 38923_at   | FSG1          | FRG1      | L76159   | FSHD region gene 1                                                                                            | 4q35           | 0.70            |

| Affy ID         | Synonyms       | Symbol      | Genbank       | Description                                                                                                                   | Chromosome      | fold difference |
|-----------------|----------------|-------------|---------------|-------------------------------------------------------------------------------------------------------------------------------|-----------------|-----------------|
| 38892_at        | DKFZp686P025   | KIAA0240    | D87077        | KIAA0240                                                                                                                      | 6p21.1          | 0.70            |
| 41183_at        | CSTF3          | CSTF3       | U15782        | Cleavage stimulation factor, 3' pre-RNA, subunit 3, 77kDa                                                                     | 11p23           | 0.69            |
| 33346_r_at      | TUBG           | TUBG1       | M61764        | Tubulin, gamma 1                                                                                                              | 17q21           | 0.69            |
| 34372_at        | KIAA0312       | UREB1       | AB002310      | Upstream regulatory element binding protein 1                                                                                 | Xp11.22         | 0.69            |
| 32218_at        | DIPP1          | NUDT3       | AF034176      | Nudix (nucleoside diphosphate linked moiety X)-type motif 3                                                                   | 6p21.2          | 0.69            |
| 41434_at        | FLJ12552       | USP46       | AF070557      | Ubiquitin specific protease 46                                                                                                | 4q12            | 0.68            |
| 32585_at        | EPB41L2        | EPB41L2     | AF027299      | Erythrocyte membrane protein band 4.1-like 2                                                                                  | 6p23            | 0.68            |
| 903_at          | PP2A           | PPP2R5A     | L42373        | Protein phosphatase 2, regulatory subunit B (B56), alpha isoform                                                              | 1q32.2-q32.3    | 0.67            |
| 39707_at        | KIAA0647       | MTMR4       | AB014547      | Myotubularin related protein 4                                                                                                | 17q22-q23       | 0.67            |
| 40431_at        | KIAA0431       | ASCIZ       | AB007891      | ATM/ATR-Substrate Chk2-Interacting Zn2+-finger protein                                                                        | 16q23.2         | 0.67            |
| 32853_at        | KIAA0719       | TOMM70A     | AB018262      | Translocase of outer mitochondrial membrane 70 homolog A                                                                      | 3q12.2          | 0.67            |
| 40822_at        | NF-AT4c        | NFATC3      | L41067        | Nuclear factor of activated T-cells, cytoplasmic, calcineurin-dependent 3                                                     | 16q22.2         | 0.67            |
| 40455_at        | KIAA0830       | KIAA0830    | AB020637      | KIAA0830 protein                                                                                                              | 11q21           | 0.66            |
| 840_at          | ZNF220         | MYST3       | U47742        | MYST histone acetyltransferase (monocytic leukemia) 3                                                                         | 8p11            | 0.65            |
| 35777_at        | SNURF          | RNF4        | AB000468      | Ring finger protein 4                                                                                                         | 4p16.3          | 0.64            |
| 41153_f_at      | CTNNA1         | CTNNA1      | AF102803      | Alpha E-catenin (CTNNA1) gene                                                                                                 | 5q31            | 0.64            |
| 41821_at        | CDC2L          | CDC2L5      | AA203246      | Cell division cycle 2-like 5 (cholinesterase-related cell division controller)                                                | 7p13            | 0.64            |
| 37735_at        | GNG10          | GNG10       | U31383        | Guanine nucleotide binding protein (G protein), gamma 10                                                                      | 9q31.3          | 0.64            |
| 40805_at        | KIAA0440       | SIPA1L1     | AB007900      | Signal-induced proliferation-associated 1 like 1                                                                              | 14q24.2         | 0.64            |
| 40472_at        | FLJ10257       | LOC254531   | AF007155      | PISC domain containing hypothetical protein                                                                                   | 15q14           | 0.63            |
| 38816_at        | AZU-1          | TACC2       | AF095791      | Transforming, acidic coiled-coil containing protein 2                                                                         | 10q26           | 0.63            |
| 38264_at        | RASGFR3        | RABIF       | U74324        | RAB interacting factor                                                                                                        | 1q32-q41        | 0.63            |
| 32878_f_at      | PPP1R3E        | PPP1R3E     | AA524802      | Protein phosphatase 1, regulatory (inhibitor) subunit 3E                                                                      | 14q11.2         | 0.63            |
| 41646_at        | JIK            | TAOK3       | AA576724      | TAO kinase 3; STE20-like kinase                                                                                               | 12q             | 0.63            |
| 39417_at        | KIAA1028       | CDC2L6      | AB028951      | Cell division cycle 2-like 6 (CDK8-like); Cyclin-dependent kinase (CDC2-like) 11                                              | 6q21            | 0.63            |
| 37159_at        | DJ159A19.3     | DJ159A19.3  | U79259        | Hypothetical protein DJ159A19.3                                                                                               | 1p36.13         | 0.62            |
| 39013_at        | ASP            | APG5L       | Y11588        | APG5 autophagy 5-like (S. cerevisiae)                                                                                         | 6q21            | 0.62            |
| 39780_at        | CALNB          | PPP3CB      | M29551        | Protein phosphatase 3 (formerly 2B), catalytic subunit, beta isoform (calcineurin A beta)                                     | 10q21-q22       | 0.62            |
| 39139_at        | SPC18          | SPC11L1     | AI357653      | Signal peptidase complex (18kD)                                                                                               | 15q25.3         | 0.62            |
| 36184_at        | PLOD           | PLOD1       | L06419        | Procollagen-lysine 1, 2-oxoglutarate 5-dioxygenase 1; Lysyl hydroxylase                                                       | 1p36.3-p36.2    | 0.62            |
| 40118_at        | Zfp113         | ZNF3        | X07290        | Zinc finger protein 3 (A8-51)                                                                                                 | 7q22.1          | 0.61            |
| 37045_at        | KIAA0254       | SNX19       | D87443        | Sorting nexin 19                                                                                                              | 11q25           | 0.60            |
| 32597_at        | p130           | RBL2        | X76061        | Retinoblastoma-like 2 (p130)                                                                                                  | 16q12.2         | 0.60            |
| 31892_at        | hR-PTPu        | PTPRM       | X58288        | Protein tyrosine phosphatase, receptor type, M                                                                                | 18p11.2         | 0.60            |
| 39346_at        | p62            | KHDRBS1     | M88108        | KH domain containing, RNA binding, signal transduction associated 1                                                           | 1p32            | 0.60            |
| 34358_at        | RPL23          | MRPL23      | Z49254        | Mitochondrial ribosomal protein L23                                                                                           | 11p15.5-p15.4   | 0.60            |
| 1825_at         | SAR1           | IQGAP1      | L33075        | IQ motif containing GTPase activating protein 1                                                                               | 15q26.1         | 0.59            |
| 32730_at        | KIAA1750       | TSPYL5      | AL080059      | TSPYL-like 5                                                                                                                  | 8q22.1          | 0.59            |
| 34218_at        | SPEG           | APEG1       | U57099        | Aortic preferentially expressed protein 1                                                                                     | 2q35            | 0.59            |
| 41243_at        | KIAA0447       | SLC35E2     | AB007916      | Solute carrier family 35, member E2                                                                                           | 1p36.33         | 0.59            |
| 35809_g_at      |                |             | AL031681      | Clone RP5-862K6 on chromosome 20q12-13                                                                                        | 20q12-q13.1     | 0.59            |
| 34817_s_at      | A2LP           | ATXN2L      | U70671        | Ataxin 2-like                                                                                                                 | 16p11           | 0.59            |
| 37659_at        | p87/89         | IMMT        | L42572        | Inner membrane protein, mitochondrial (mitofilin)                                                                             | 2               | 0.59            |
| 37646_at        | KIAA0039       | POLD3       | D26018        | Polymerase (DNA-directed), delta 3, accessory subunit                                                                         | 11q14           | 0.59            |
| <b>39097_at</b> | <b>SON3</b>    | <b>SON3</b> | <b>X63753</b> | <b>SON DNA binding protein</b>                                                                                                | <b>21q22.11</b> | <b>0.59</b>     |
| 41708_at        | KIAA1034       | SATB2       | AB028957      | SATB family member 2                                                                                                          | 2q33            | 0.59            |
| 38142_at        | ZNF-25         | ZNF211      | U38904        | Zinc finger protein 211                                                                                                       | 19q13.4         | 0.58            |
| 39861_at        | EMS1           | CTTN        | M98343        | Cortactin                                                                                                                     | 11q13           | 0.58            |
| 34676_at        | KIAA1099       | CENTG2      | AB029022      | Trinucleotide repeat containing 17                                                                                            | 2p24.3-p24.1    | 0.57            |
| 35363_at        | P72            | DDX17       | AL080113      | DEAD (Asp-Glu-Ala-Asp) box polypeptide 17                                                                                     | 22q13.1         | 0.57            |
| 35779_at        | H1VPS45        | VPS45A      | AJ133421      | Vacuolar protein sorting 45A (yeast)                                                                                          | 1q21-q22        | 0.57            |
| 32628_at        | DB1            | ZNF161      | D28118        | Zinc finger protein 161                                                                                                       | 17q23.2         | 0.56            |
| 39718_r_at      | RPL33L         | MRPL33      | N98607        | Mitochondrial ribosomal protein L33                                                                                           | 2p21            | 0.56            |
| 40801_at        | DKFZP434C212   | GAPVD1      | AA643063      | GTPase activating protein and VPS9 domains 1                                                                                  | 9q33.3          | 0.56            |
| 35764_at        | CX-ORF5 (71-7) | OFD1        | Y15164        | Oral-facial-digital syndrome 1                                                                                                | Xp22.2-p22.3    | 0.56            |
| 38733_at        | Ku80           | XRCC5       | M30938        | X-ray repair complementing defective repair in Chinese hamster cells 5 (double-strand-break rejoining; Ku autoantigen, 80kDa) | 2q35            | 0.56            |
| 585_at          | Ku80           | XRCC5       | M30938        | X-ray repair complementing defective repair in Chinese hamster cells 5 (double-strand-break rejoining; Ku autoantigen, 80kDa) | 2q35            | 0.56            |
| 39706_at        | KIAA0636       | CPNE3       | AB014536      | Copine III                                                                                                                    | 8q21.3          | 0.55            |
| 36551_at        | KIAA0373       | Cep290      | AL049382      | Centrosome protein cep290                                                                                                     | 12q21.33        | 0.55            |
| 33296_at        | KIAA0836       | GLCE        | AB020643      | Glucuronyl C5-epimerase                                                                                                       | 15q23           | 0.55            |

| Affy ID    | Synonyms     | Symbol     | Genbank  | Description                                                                                   | Chromosome     | fold difference |
|------------|--------------|------------|----------|-----------------------------------------------------------------------------------------------|----------------|-----------------|
| 37725_at   | PPPIG        | PPP1CC     | X74008   | Protein phosphatase 1, catalytic subunit, gamma isoform                                       | 12q24.1-q24.2  | 0.54            |
| 41860_at   | LOC93081     | LOC93081   | AF070559 | Hypothetical protein BC015148                                                                 | 13q33.1        | 0.54            |
| 41196_at   | IMB1         | KPNB1      | L38951   | Karyopherin (importin) beta 1                                                                 | 17q21.32       | 0.53            |
| 41205_at   | EPVE6AP      | UBE3A      | U84404   | Ubiquitin protein ligase E3A (human papilloma virus E6-associated protein, Angelman syndrome) | 15q11-q13      | 0.53            |
| 34730_g_at | KIAA1114     | TRO        | AB029037 | Trophinin                                                                                     | Xp11.22-p11.21 | 0.52            |
| 38837_at   | KIAA1162     | DJ971N18.2 | W26226   | Hypothetical protein LOC56255                                                                 | 20p12          | 0.52            |
| 192_at     | TAFII55      | TAF7       | U18062   | TAF7 RNA polymerase II, TATA box binding protein (TBP)-associated factor, 55kDa               | 5q31           | 0.52            |
| 33340_at   | KIAA0438     | PJA2       | AB007898 | Praja 2, RING-H2 motif containing                                                             | 5q21.3         | 0.52            |
| 38365_at   | ZWS1         | PEX1       | AF026086 | Peroxisome biogenesis factor 1                                                                | 7q21-q22       | 0.52            |
| 40994_at   | GRK5         | GRK5       | L15388   | G protein-coupled receptor kinase 5                                                           | 10q24-qter     | 0.51            |
| 33907_at   | eIF4G3       | EIF4G3     | AF012072 | Eukaryotic translation initiation factor 4 gamma, 3                                           | 1p36.12        | 0.51            |
| 41669_at   | KIAA0191     | KIAA0191   | D83776   | Zinc finger, CCHC domain containing 11                                                        | 1p32.3         | 0.51            |
| 33661_at   | RPL5         | RPL5       | U66589   | Similar to RIKEN cDNA 2900024C23                                                              | 1p22.1         | 0.50            |
| 39692_at   | DKFZP586F242 | DKFZP586F  | AL080209 | CAMP responsive element binding protein 3-like 2                                              | 7q34           | 0.50            |
| 39136_at   | ODD          | OSR1       | AB017642 | Oxidative-stress responsive 1                                                                 | 2p24.1         | 0.50            |
| 32768_at   | FLJ21007     | TDRD3      | AL048308 | Tudor domain containing 3                                                                     | 13q21.2        | 0.50            |
| 33893_r_at | KAB          | KIAA0470   | AB007939 | KARP-1-binding protein                                                                        | 1q44           | 0.49            |
| 35802_at   | KIAA1014     | FNBP4      | AB023231 | Formin binding protein 4                                                                      | 11p11.2        | 0.49            |
| 36532_at   | INPP5H       | SYNJ2      | AF039945 | Synaptojanin 2                                                                                | 6q25.3         | 0.49            |
| 34649_at   | CSPG1        | AGC1       | M14219   | Chondroitin/dermatan sulfate proteoglycan (PG40) core protein                                 | 15q26.1        | 0.49            |
| 35187_at   |              |            | AL080216 | DKFZp586K1123 cDNA                                                                            | 1              | 0.49            |
| 39983_at   | FAP48        | GLMN       | U73704   | Glomulin, FKBP associated protein                                                             | 1p22.1         | 0.49            |
| 36692_at   | MTMR9        | MTMR9      | AF052099 | Myotubularin related protein 9                                                                | 8p23-p22       | 0.47            |
| 1348_s_at  | PCCA         | PCCA       | S79219   | Propionyl Coenzyme A carboxylase, alpha polypeptide                                           | 13q32          | 0.47            |
| 1836_at    | CYC1         | CCNI       | D50310   | Cyclin I                                                                                      | 4q21.1         | 0.46            |
| 34677_f_at | tl132        | LOC220594  | AJ012755 | TL132 protein                                                                                 | 17p11.2        | 0.46            |
| 39619_at   | REEP2        | LOC51308   | AF070551 | Chromosome 5 open reading frame 19                                                            | 5q31           | 0.46            |
| 35142_at   | DKFZP564D172 | DKFZP564D  | AF070617 | Hypothetical protein FLJ12078                                                                 | 5q15           | 0.45            |
| 36161_at   | AP2B1        | AP2B1      | M34175   | Adaptor-related protein complex 2, beta 1 subunit                                             | 17q11.2-q12    | 0.44            |
| 40701_at   | ISOT-3       | USP13      | U75362   | Ubiquitin specific protease 13 (isopeptidase T-3)                                             | 3q26.2-q26.3   | 0.44            |
| 41747_s_at | MEF2A        | MEF2A      | U49020   | Myocyte enhancer factor 2A                                                                    | 15q26          | 0.44            |
| 36225_s_at | SFPQ         | SFPQ       | W27611   | Splicing factor proline/glutamine rich (polypyrimidine tract binding protein associated)      | 1p34.3         | 0.43            |
| 35625_at   | CD97         | CD97       | X94630   | CD97 transmembrane protein                                                                    | 19p13          | 0.43            |
| 34785_at   | KIAA1025     | THRAP2     | AB028948 | Thyroid hormone receptor associated protein 2                                                 | 12q24.21       | 0.43            |
| 531_at     | GliPR        | GLIPR1     | U16307   | GLI pathogenesis-related 1 (glioma)                                                           | 12q21.1        | 0.41            |
| 41872_at   | DFNA5        | DFNA5      | AF073308 | Deafness, autosomal dominant 5                                                                | 7p15           | 0.37            |
| 36089_at   | SAC2         | VPS52      | AB023183 | Inositol polyphosphate-5-phosphatase F                                                        | 6p21.3         | 0.36            |
| 32317_s_at | STP2         | SULT1A2    | U34804   | Thermostable phenol sulfotransferase                                                          | 16p12.1        | 0.34            |
| 33303_at   | SSPN         | SSPN       | N21470   | Sarcospan                                                                                     | 12p11.2        | 0.29            |
| 33658_at   | ZNF124       | ZNF124     | S54641   | Zinc finger protein 124                                                                       | 1q44           | 0.29            |
| 41610_at   | KIAA0533     | LAMA5      | AB011105 | Laminin, alpha 5                                                                              | 20q13.2-q13.3  | 0.20            |
| 38170_at   | clone 24583  |            | AF070595 | Clone 24583 mRNA sequence                                                                     | 9              | 0.18            |
| 37251_s_at | m6b1         | GPM6B      | AF016004 | proteolipid 6B                                                                                | Xp22.2         | 0.09            |
