# Supplementary material for: Cell type-specific over-expression of chromosome 21 genes in fibroblasts and fetal hearts with trisomy 21
Source: PubMed Central journal article supplement (PMC1435874; doi:10.1186/1471-2350-7-24), 2006-03-15
Supplement: 1471-2350-7-24-S4.pdf [file 1471-2350-7-24-S4.pdf]

| Supplemental Table 4. Genes over- or under-expressed in fetal hearts with +21. ANOVA, p<.05. |                 |                  |                 |                                                                                                                                   |                      |                 |
|----------------------------------------------------------------------------------------------|-----------------|------------------|-----------------|-----------------------------------------------------------------------------------------------------------------------------------|----------------------|-----------------|
| Affy ID                                                                                      | Synonyms        | Symbol           | Genbank         | Description                                                                                                                       | Chromosome           | fold difference |
| 33455_at                                                                                     |                 | ALDOB            | X02747          | Aldolase B, fructose-bisphosphate                                                                                                 | 9q21.3-q22.2         | 4.56            |
| 32027_at                                                                                     |                 | PDZK1            | AF012281        | PDZ domain containing 1                                                                                                           | 1q21                 | 3.99            |
| 40954_at                                                                                     |                 | FXVD2            | H94881          | FXVD domain containing ion transport regulator                                                                                    | 11q23                | 3.65            |
| 39151_at                                                                                     |                 | PLAC3; PAPPE     | AL031290        | Clone RP4-774I24 on chromosome 1q24.1-24.4                                                                                        | 1q23-q25             | 3.47            |
| 425_at                                                                                       |                 | ISG12            | X67325          | Interferon, alpha-inducible protein 2                                                                                             | 14q32                | 3.47            |
| <b>38384_at</b>                                                                              | <b>GART</b>     | <b>GART</b>      | <b>X54199</b>   | <b>Phosphoribosylglycinamide formyltransferase, phosphoribosylglycinamide synthetase, phosphoribosylaminoimidazole synthetase</b> | <b>21q22.11</b>      | <b>3.02</b>     |
| 291_s_at                                                                                     | M1S1            | TACSTD2          | J04152          | GA733-1 protein precursor; Human gastrointestinal tumor-associated antigen GA733-1 protein gene, complete cds, clone 05516.       | 1p32-p31             | 2.75            |
| 35692_at                                                                                     | DKFZp586E162    | RIS1             | AL080235        | Ras-induced senescence 1                                                                                                          | 3p21.3               | 2.63            |
| 38469_at                                                                                     | TM4SF3          | TSPAN8           | M35252          | Transmembrane 4 superfamily member 3                                                                                              | 12q14.1-q21.1        | 2.60            |
| 40201_at                                                                                     | ddc             | DDC              | M76180          | Dopa decarboxylase (aromatic L-amino acid decarboxylase)                                                                          | 7p11                 | 2.54            |
| 39660_at                                                                                     | DEFB1           | DEFB1            | A1309115        | Defensin, beta 1                                                                                                                  | 8p23.2-p23.1         | 2.34            |
| 40071_at                                                                                     | CYP1B1          | CYP1B1           | U03688          | Cytochrome P450, family 1, subfamily B, polypeptide 1                                                                             | 2p21                 | 2.33            |
| 31737_at                                                                                     | ACTA1           | ACTA1            | J00068          | Actin, alpha 1, skeletal muscle                                                                                                   | 1q42.13-q42.2        | 2.29            |
| 828_at                                                                                       | PTGER2          | PTGER2           | U19487          | Prostaglandin E receptor 2 (subtype EP2), 53kDa                                                                                   | 14q22                | 2.24            |
| 37202_at                                                                                     | F2              | F2               | J00307          | Prothrombin                                                                                                                       | 11p11-q12            | 2.15            |
| 859_at                                                                                       | CYP1B1          | CYP1B1           | U03688          | Cytochrome P450, family 1, subfamily B, polypeptide 1                                                                             | 2p21                 | 2.15            |
| 36256_at                                                                                     | LSAMP           | LSAMP            | U41901          | Limbic system-associated membrane protein                                                                                         | 3q13.2-q21           | 2.10            |
| <b>37827_r_at</b>                                                                            | <b>C21orf5</b>  | <b>C21orf5</b>   | <b>AJ237839</b> | <b>Chromosome 21 open reading frame 5, transcription factor?</b>                                                                  | <b>21q22.2</b>       | <b>2.09</b>     |
| 36245_at                                                                                     | HTR2B           | HTR2B            | X77307          | 5-hydroxytryptamine (serotonin) receptor 2f                                                                                       | 2q36.3-q37.1         | 2.05            |
| 33364_at                                                                                     | PDE4DIP         | PDE4DIP          | U51694          | Phosphodiesterase 4D interacting protein                                                                                          | 1q12                 | 2.03            |
| 39260_at                                                                                     | MCT             | SLC16A4          | U59185          | Solute carrier family 16 (monocarboxylic acid transporters) 4                                                                     | 1p13.3               | 2.00            |
| 35680_r_at                                                                                   | DPP6            | DPP6             | M96860          | Dipeptidylpeptidase 6                                                                                                             | 7q36.2               | 1.99            |
| 34316_at                                                                                     | RPS15A          | RPS15A           | W52024          | Ribosomal protein S15a                                                                                                            | 16p                  | 1.96            |
| 37871_at                                                                                     | IAPP; DAP; AM   | IAPP             | X68830          | Islet amyloid polypeptide                                                                                                         | 12p12.3-p12.1        | 1.94            |
| 37459_at                                                                                     | COL8A1          | COL8A1           | X57527          | Collagen, type VIII, alpha 1                                                                                                      | 3q12.3               | 1.91            |
| 38201_at                                                                                     | ECA39           | BCAT1            | U21551          | Branched chain aminotransferase 1, cytosolic                                                                                      | 12pter-q12           | 1.88            |
| 40413_at                                                                                     | MRPS29          | DAP3             | U18321          | Death associated protein 3                                                                                                        | 1q21-q22             | 1.88            |
| 33203_s_at                                                                                   | FREAC-4         | FOXO1            | U59831          | Forkhead related activator 4 (FREAC-4)                                                                                            | 5q12-q13             | 1.87            |
| <b>34559_at</b>                                                                              |                 | <b>LOC388818</b> | <b>H55746</b>   | <b>Similar to RIKEN cDNA Z310002B14</b>                                                                                           | <b>21q22.11</b>      | <b>1.85</b>     |
| 38430_at                                                                                     | FABP4           | FABP4            | AA128249        | Fatty acid binding protein 4, adipocyte                                                                                           | 8q21                 | 1.84            |
| 39248_at                                                                                     | AQP3            | AQP3             | N74607          | Aquaporin 3                                                                                                                       | 9p13                 | 1.82            |
| 39999_at                                                                                     | Mch4            | CASP10           | U60519          | Caspase 10                                                                                                                        | 2q33-q34             | 1.82            |
| 37399_at                                                                                     | KIAA0119        | AKR1C3           | D17793          | Aldo-keto reductase family (3-alpha hydroxysteroid dehydrogenase, type II)                                                        | 10p15-p14            | 1.81            |
| 32486_at                                                                                     | CKMM            | CKM              | AC005781        | Creatine kinase, muscle; M chair                                                                                                  | 19q13.2-q13.3        | 1.81            |
| 35422_at                                                                                     | MAP2            | MAP2             | U01828          | Microtubule-associated protein 2                                                                                                  | 2q34-q35             | 1.78            |
| 32818_at                                                                                     | TNC             | TNC              | X78565          | Tenascin C (hexabrachion)                                                                                                         | 9q33                 | 1.77            |
| 38978_at                                                                                     | PAIP1           | PAIP1            | AF013758        | Poly(A) binding protein interacting protein                                                                                       | 5p12                 | 1.75            |
| <b>31477_at</b>                                                                              | <b>TF3</b>      | <b>TF3</b>       | <b>L08044</b>   | <b>Trefoil factor 3 (intestinal)</b>                                                                                              | <b>21q22.3</b>       | <b>1.75</b>     |
| 116_at                                                                                       | PRKAR2A         | PRKAR2A          | X14968          | Protein kinase, cAMP-dependent, regulatory, type II, alpha                                                                        | 3p21.3-p21.2         | 1.73            |
| 37687_f_at                                                                                   | CD32            | FCGR2A           | M31932          | Fc fragment of IgG, low affinity IIa, receptor                                                                                    | 1q23                 | 1.73            |
| 1574_s_at                                                                                    | IL4             | IL4              | M13982          | Interleukin 4                                                                                                                     | 5q31.1               | 1.72            |
| 37284_at                                                                                     | CD100           | SEMA4D           | U60800          | Semaphorin 4D                                                                                                                     | 9q22-q31             | 1.72            |
| 39674_r_at                                                                                   | ECM2            | ECM2             | AB011792        | Extracellular matrix protein 2                                                                                                    | 9q22.3               | 1.72            |
| 1008_f_at                                                                                    | Pkr             | EIF2AK2          | U50648          | Interferon-inducible RNA-dependent protein kinase                                                                                 | 2p22-p21             | 1.71            |
| 39968_at                                                                                     | LTC4S           | LTC4S            | U50136          | Leukotriene C4 synthase                                                                                                           | 5q35                 | 1.70            |
| 245_at                                                                                       | LNHR            | SELL             | M25280          | Selectin L (lymphocyte adhesion molecule 1)                                                                                       | 1q23-q25             | 1.70            |
| 33462_at                                                                                     | GPR105          | AQP3             | D13626          | Purinergic receptor P2Y, G-protein coupled, 14                                                                                    | 3q21-q25             | 1.66            |
| 38919_at                                                                                     | KIAA1009        | C6orf84          | AB023226        | Chromosome 6 open reading frame 84                                                                                                | 6q14.3               | 1.66            |
| <b>38738_at</b>                                                                              | <b>SMT3A</b>    | <b>SUM03</b>     | <b>X99584</b>   | <b>SMT3 suppressor of mif two homolog 3</b>                                                                                       | <b>21q22.3</b>       | <b>1.66</b>     |
| 36155_at                                                                                     | Testican-2      | KIAA0275         | D87465          | Sparc/osteonectin, cwcv and kazal-like domains proteoglycan (testican) 2                                                          | 10pter-q25.3         | 1.63            |
| 1300_at                                                                                      | DKFZp781P091    | XRCC2            | Y08837          | X-ray repair complementing defective repair in Chinese hamster cells 2                                                            |                      | 1.62            |
| <b>306_s_at</b>                                                                              | <b>HMG14</b>    | <b>HMG1</b>      | <b>J02621</b>   | <b>High-mobility group nucleosome binding domain 1</b>                                                                            | <b>21q22.2</b>       | <b>1.62</b>     |
| 31623_f_at                                                                                   | MT1             | MT1A             | K01383          | Metallothionein I-A gene                                                                                                          | 16q13                | 1.61            |
| 37835_at                                                                                     | CD1, a1 domain  | CD1C             | M28827          | CD1C antigen, c polypeptide                                                                                                       | 1q22-q23             | 1.61            |
| 32250_at                                                                                     | CFH             | CFH              | X07523          | Complement factor H                                                                                                               | 1q32                 | 1.61            |
| 40587_s_at                                                                                   | P18             | EEF1E1           | AF054186        | Eukaryotic translation elongation factor 1 epsilon                                                                                | 6p24.3-p25.1         | 1.60            |
| 1975_s_at                                                                                    | IGF-1           | IGF1             | X03563          | Insulin-like growth factor                                                                                                        | 12q22-q23            | 1.60            |
| 38338_at                                                                                     | RRAS            | RRAS             | A1201108        | Related RAS viral (f-ras) oncogene homolog                                                                                        | 19q13.3-qter         | 1.58            |
| 36839_at                                                                                     | HsCDC6          | CDC6             | U77949          | CDC6 cell division cycle 6 homolog (S. cerevisiae)                                                                                | 17q21.3              | 1.57            |
| <b>36107_at</b>                                                                              | <b>F6</b>       | <b>ATP5J</b>     | <b>AA845575</b> | <b>ATP synthase, H+ transporting, mitochondrial F0 complex, subunit F6</b>                                                        | <b>21q21.1</b>       | <b>1.55</b>     |
| 201_s_at                                                                                     | B2M             | B2M              | S82297          | Beta-2-microglobulin                                                                                                              | 15q21-q22.2          | 1.54            |
| 33267_at                                                                                     | ATPASE11        | ATP8A1           | AF035315        | ATPase, aminophospholipid transporter (APLT), Class I, type 8A, member 1                                                          | 4p14-p12             | 1.54            |
| <b>39767_at</b>                                                                              | <b>KIAA0002</b> | <b>CCT8</b>      | <b>D13627</b>   | <b>Chaperonin containing TCP1, subunit 8 (theta)</b>                                                                              | <b>21q22.11</b>      | <b>1.53</b>     |
| 121_at                                                                                       | PAX8            | PAX8             | X69699          | Paired box gene 8                                                                                                                 | 2q12-q14             | 1.53            |
| 34708_at                                                                                     | HAKA1           | FCN3             | D88587          | Ficolin/Opsolin p35 lectin family; Hakata antigen                                                                                 | 1p36.11              | 1.52            |
| 37177_at                                                                                     | LFA-3           | CD58             | Y00636          | CD58 antigen, (lymphocyte function-associated antigen 3)                                                                          | 1p13                 | 1.52            |
| 33358_at                                                                                     | KIAA1157        | PPM1H            | W29087          | Protein phosphatase 1H (PP2C domain containing)                                                                                   | 12q14.1-q14.2        | 1.52            |
| 755_at                                                                                       | Insp3r1         | ITPR1            | D26070          | Inositol 1,4,5-trisphosphate receptor, type 1                                                                                     | 3p26-p25             | 1.52            |
| <b>39348_at</b>                                                                              | <b>HRMT1L1</b>  | <b>HRMT1L1</b>   | <b>X99209</b>   | <b>HMT1 hnRNP methyltransferase-like 1</b>                                                                                        | <b>21q22.3</b>       | <b>1.52</b>     |
| 38700_at                                                                                     | CSRFP           | CSRFP            | M33146          | Cysteine and glycine-rich protein                                                                                                 | 1q32                 | 1.51            |
| 33327_at                                                                                     | KIAA0954        | C11orf9          | AB023171        | Chromosome 11 open reading frame 9                                                                                                | 11q12-q13.1          | 1.51            |
| <b>36039_s_at</b>                                                                            | <b>21-garp</b>  | <b>SH3BGR</b>    | <b>X93498</b>   | <b>SH3 domain binding glutamic acid-rich protein</b>                                                                              | <b>21q22.3</b>       | <b>1.51</b>     |
| 1440_s_at                                                                                    | Fas/Apo-1       | TNFRSF6          | X83490          | Tumor necrosis factor receptor 6                                                                                                  | 1p33                 | 1.51            |
| <b>37218_at</b>                                                                              | <b>TOFA</b>     | <b>BTG3</b>      | <b>D64110</b>   | <b>BTG family, member 3</b>                                                                                                       | <b>21q21.1-q21.2</b> | <b>1.49</b>     |
| 41244_f_at                                                                                   | PP-1B           | PPP1CB           | X80910          | Protein phosphatase 1, catalytic subunit, beta isoform                                                                            | 2p23                 | 1.49            |
| 38154_at                                                                                     |                 |                  | AF038199        | Similar to hypothetical protein LOC283585                                                                                         |                      | 1.48            |
| 35229_at                                                                                     | CPT1            | CPT1A            | L39211          | Carnitine palmitoyltransferase 1A (liver)                                                                                         | 11q13.1-q13.2        | 1.48            |
| 33179_at                                                                                     | IPP2            | PPP1R2           | A1625801        | Protein phosphatase 1, regulatory (inhibitor) subunit 2                                                                           | 3q29                 | 1.47            |
| 39594_f_at                                                                                   | MT1H            | MT1H             | R93527          | Metallothionein 1H                                                                                                                | 16q13                | 1.47            |
| 40858_at                                                                                     | PSBG1           | PSG1             | M34715          | Pregnancy specific beta-1-glycoprotein                                                                                            | 19q13.2              | 1.47            |
| 40074_at                                                                                     | NMDMC           | MTHFD2           | X16396          | Methylene tetrahydrofolate dehydrogenase (NAD+ dependent); methenyltetrahydrofolate cyclohydrolase                                | 2p13.1               | 1.46            |
| 34995_at                                                                                     | CRLR            | CALCRL           | L76380          | Calcitonin receptor-like                                                                                                          | 2q32.1               | 1.46            |

| Affy ID    | Synonyms           | Symbol    | Genbank  | Description                                                                                                   | Chromosome    | fold difference |
|------------|--------------------|-----------|----------|---------------------------------------------------------------------------------------------------------------|---------------|-----------------|
| 37756_at   |                    | RYK1      | RYK      | RYK receptor-like tyrosine kinase                                                                             | 3q22          | 1.45            |
| 35816_at   | cystatin B         | CSTB      | U46692   | <b>EPM1 disease gene; cysteine protease inhibitor; Cystatin B</b>                                             | 21q22.3       | 1.44            |
| 36204_at   | LAR                | PTPRF     | Y00815   | Protein tyrosine phosphatase, receptor type, I                                                                | 1p34          | 1.44            |
| 37231_at   | KIAA0008           | DLG7      | D13633   | Discs, large homolog 7 (Drosophila)                                                                           | 14q22.3       | 1.44            |
| 39005_s_at | KIAA0714           | ZNF294    | AB018257 | <b>Zinc finger protein 294</b>                                                                                | 21q22.11      | 1.43            |
| 36042_at   | trkB               | NTRK2     | X75958   | Neurotrophic tyrosine kinase, receptor, type 2                                                                | 9q22.1        | 1.42            |
| 33228_g_at | IL-10R2            | IL10RB    | A1984234 | <b>Interleukin 10 receptor, beta</b>                                                                          | 21q22.11      | 1.41            |
| 879_at     | MX2                | MX2       | M30818   | <b>Myxovirus (influenza virus) resistance 2</b>                                                               | 21q22.3       | 1.40            |
| 38066_at   | DLA4               | NQO1      | M81600   | NAD(P)H:quinone oxidoreductase                                                                                | 16q22.1       | 1.40            |
| 34667_at   | NFX2; MGC203       | NFX1      | U15306   | Nuclear transcription factor, X-box binding                                                                   | 9p13.3        | 1.40            |
| 32112_s_at | ST4                | AIM1      | A1800499 | Absent in melanoma 1                                                                                          | 6q21          | 1.39            |
| 38164_at   | COD1               | RPGR      | U57629   | Retinitis pigmentosa GTPase regulator                                                                         | Xp11.4        | 1.39            |
| 37902_at   | CRYZ               | CRYZ      | L13278   | Crystallin, zeta (quinone reductase)                                                                          | 1p31-p22      | 1.39            |
| 36332_at   | SNAT; AA-NAT       | AAAT      | U40391   | Serotonin N-acetyltransferase                                                                                 | 17q25         | 1.39            |
| 39917_at   | GCP2               | TUBGCP2   | A1961040 | Tubulin, gamma complex associated protein 2                                                                   | 10q26.3       | 1.38            |
| 32168_s_at | DSCR1              | DSCR1     | U85267   | <b>Down syndrome critical region gene 1</b>                                                                   | 21q22.12      | 1.37            |
| 37716_at   | MOX2               | CD200     | X05323   | MOX2 gene; OX-2 membrane glycoprotein                                                                         | 3q12-q13      | 1.36            |
| 37264_at   | pHZ-10             | ZNF131    | U09410   | Zinc finger protein 131 (clone pHZ-10)                                                                        | 5p12-p11      | 1.35            |
| 35537_at   | DCR2               | TNFRSF10D | AF029761 | Tumor necrosis factor receptor superfamily, member 10d decoy with truncated death domain                      | 8p21          | 1.35            |
| 34160_at   | beta-actin         | ACTG1     | X04098   | Actin, gamma 1                                                                                                | 17q25         | 1.34            |
| 32272_at   | K-ALPHA-1          | K-ALPHA-1 | K00558   | Tubulin, alpha, ubiquitous                                                                                    | 12q13.12      | 1.34            |
| 36181_at   | MLN 50; Lasp-1     | LASP1     | X82456   | LIM and SH3 protein 1                                                                                         | 17q11-q21.3   | 1.33            |
| 38826_at   | KIAA0128           | SEPT6     | D50918   | Septin 6                                                                                                      | Xq24          | 1.33            |
| 32236_at   | UBC7               | UBC2G     | AF032456 | <b>Ubiquitin conjugating enzyme G7</b>                                                                        | 21q22.3       | 1.32            |
| 31622_t_at | MT1F               | MT1F      | M10943   | Metallothionein 1F                                                                                            | 16q13         | 1.31            |
| 36160_s_at | PTPRP              | PTPRN2    | U81561   | Protein tyrosine phosphatase, receptor type, N polypeptide 2                                                  | 7q36          | 1.31            |
| 32443_at   | HZF22              | ZNF157    | U28687   | Zinc finger protein 157 (HZF22)                                                                               | Xp11.2        | 1.31            |
| 457_s_at   | UBL1               | SUMO-1    | U67122   | SMT3 suppressor of mit two 3 homolog 1 (yeast)                                                                | 2q33          | 1.31            |
| 185_at     | Nova-1             | NOVA1     | U04840   | Neuro-oncological ventral antigen 1                                                                           | 14q           | 0.75            |
| 41715_at   | C2-Pi3K            | PIK3C2B   | Y11312   | Phosphoinositide-3-kinase, class 2, beta polypeptide                                                          | 1q32          | 0.75            |
| 36909_at   | Wee1 Hu            | WEE1      | X62048   | WEE1 homolog (S. pombe)                                                                                       | 11p15.3-p15.1 | 0.75            |
| 35289_at   | GAPCENA            | RABGAP1   | AJ011679 | RAB GTPase activating protein 1                                                                               | 9q33.2-q33.3  | 0.75            |
| 35638_at   | CBFA2T1            | RUNX1T1   | D43638   | Core-binding factor, runt domain, alpha subunit 2; translocated to, 1 (cyclin D-related)                      | 8q22          | 0.74            |
| 35408_t_at | KOX7               | ZNF44     | X16281   | Hypothetical protein DKFZp686L2113c                                                                           | 19p13.2       | 0.74            |
| 37561_at   |                    | AL031778  |          | Clone RP1-34B21 on chromosome 6p12.1-21.1                                                                     | 6p12.1-p21.1  | 0.74            |
| 39058_at   | MDB                | ABR       | U01147   | Active BCR-related gene                                                                                       | 17p13.3       | 0.74            |
| 38036_at   | RPI                | RPIA      | L35035   | Ribose 5-phosphate isomerase A (ribose 5-phosphate epimerase)                                                 | 2p11.2        | 0.74            |
| 40905_s_at | DKFZp566J153       | PRPF31    | AL050369 | PRP31 pre-mRNA processing factor 31 homolog (yeast)                                                           | 19q13.42      | 0.74            |
| 40102_at   | KIAA0772           | OSBPL2    | AB018315 | Oxysterol binding protein-like 2                                                                              | 20q13.3       | 0.74            |
| 36115_at   | clk3               | CLK3      | L29217   | CDC-like kinase 3                                                                                             | 15q24         | 0.74            |
| 33333_at   | KIAA0403           | PIP3-E    | AB007863 | Phosphoinositide-binding protein PIP3-E                                                                       | 6q25.2        | 0.74            |
| 39794_at   | KIAA0055           | USP8      | D29956   | Ubiquitin specific protease 8                                                                                 | 15q21.2       | 0.74            |
| 37410_at   | MED24              | SURF5     | AJ224358 | Surfeit 5                                                                                                     | 9q34.2        | 0.73            |
| 1274_s_at  | E2-CDC34           | CDC34     | L22005   | Cell division cycle 34                                                                                        | 19p13.3       | 0.73            |
| 40801_at   | DKFZP434C212       | GAPVD1    | AA643063 | DKFZP434C212 protein                                                                                          | 9q33.3        | 0.73            |
| 33457_at   | KIAA1105           | RAP14     | AB029028 | Retinoblastoma-associated protein 14c                                                                         | 3p14.3        | 0.73            |
| 33881_at   | ACSL3              | FA1C3     | AA977580 | Acyl-CoA synthetase long-chain family member 3                                                                | 2q34-q35      | 0.73            |
| 1797_at    | INK4D              | CDKN2D    | U40343   | Cyclin-dependent kinase inhibitor 2D (p19, inhibits CDK4)                                                     | 19p13         | 0.73            |
| 34169_s_at | OCRL1              | OCRL      | U57627   | Oculocerebrorenal syndrome of Lowe                                                                            | Xq25-q26.1    | 0.73            |
| 39777_at   | KIAA0916           | MYCBP2    | AF075587 | MYC binding protein 2                                                                                         | 13q22         | 0.73            |
| 38642_at   | MEMD               | ALCAM     | Y10183   | Activated leukocyte cell adhesion molecule                                                                    | 3q13.1        | 0.73            |
| 35720_at   | KIAA0893           | WDR47     | AB020700 | KIAA0893 protein; WD repeat domain 47                                                                         | 1p13.3        | 0.72            |
| 38908_s_at | POLZ               | REV3L     | AL096744 | REV3-like, catalytic subunit of DNA polymerase zeta (yeast)                                                   | 6q21          | 0.72            |
| 35799_at   | MDG1               | DNAJB9    | AL080081 | DnaJ (Hsp40) homolog, subfamily B, member 9                                                                   | 14q24.2-q24.3 | 0.72            |
| 40631_at   | TOB1               | TOB1      | D38305   | Transducer of ERBB2, 1                                                                                        | 17q21         | 0.72            |
| 32212_at   | AIF                | PDCD8     | AL049703 | Programmed cell death 8                                                                                       | Xq25-q26      | 0.72            |
| 32807_at   | BKLHD1; DKFZ       | KBTBD2    | AF004292 | Kelch repeat and BTB (POZ) domain containing 2                                                                | 7p14.3        | 0.72            |
| 840_at     | MOZ                | ZNF220    | U47742   | MYST histone acetyltransferase (monocytic leukemia) 3                                                         | 8p11          | 0.72            |
| 31823_at   | CDP                | CUTL1     | M74099   | Cut-like 1, CCAAT displacement protein                                                                        | 7q22.1        | 0.72            |
| 38741_at   | Sec7p-L            | PSCD2     | U70728   | Pleckstrin homology, Sec7 and coiled-coil domains 2                                                           | 19q13.3       | 0.71            |
| 41821_at   | CHED               | CDC2L5    | AA203246 | Cell division cycle 2-like 5 (cholinesterase-related cell division controller)                                | 7p13          | 0.71            |
| 980_at     | NPC                | NPC1      | AF002020 | Niemann-Pick disease, type C1                                                                                 | 18q11-q12     | 0.71            |
| 38013_at   | MTSG1              | MTUS1     | AL096842 | Mitochondrial tumor suppressor 1                                                                              | 8p22          | 0.71            |
| 31847_at   | D13S106E           | C13orf22  | X59131   | Chromosome 13 open reading frame 22                                                                           | 13q12-q14     | 0.71            |
| 34903_at   | MGC33190           | ATXNL7L4  | AI017382 | Ataxin 7-like 1                                                                                               | 7q22.3        | 0.71            |
| 37910_at   | RENBP; RBP; RHCFC1 | HCF1      | U52112   | Chromosome X clone QLL-D9139, Qc-7G12, Qc-7C1, Qc-12B2, Qc-12D5, QLL-A074, Qc-9D3 map q28, complete sequence. | Xq28          | 0.71            |
| 41177_at   | PFAAP3             | FLJ12443  | AW024285 | Hypothetical protein FLJ12443c                                                                                | 5p15.33       | 0.71            |
| 38270_at   | PARG99             | PARG      | AF005043 | Poly (ADP-ribose) glycohydrolase                                                                              | 10q11.23      | 0.71            |
| 40826_at   | KP78               | MARK3     | M80359   | MAP/microtubule affinity-regulating kinase 3                                                                  | 14q32.3       | 0.71            |
| 453_at     | BAF170             | SMARCC2   | U66616   | SWI/SNF related, matrix associated, actin dependent regulator of chromatin, subfamily c, member 2             | 12q13-q14     | 0.71            |
| 38306_at   | BIG1               | ARFGEF1   | AA477576 | ADP-ribosylation factor guanine nucleotide-exchange factor 1 (brefeldin A-inhibited)                          | 8q13          | 0.70            |
| 36580_at   | FLJ21795           | FLJ13910  | AL050139 | Hypothetical protein FLJ13910c                                                                                | 2p11.2        | 0.70            |
| 37047_at   | NPC                | NPC1      | AF002020 | Niemann-Pick disease, type C1                                                                                 | 18q11-q12     | 0.70            |
| 35203_at   | MORF               | MYST4     | AB002381 | MYST histone acetyltransferase (monocytic leukemia) 4                                                         | 10q22.2       | 0.70            |
| 36048_at   | HRIHFB2436         | ZFP318    | AB015342 | Zinc finger protein 318                                                                                       | 6pter-p12     | 0.70            |
| 33288_t_at | FPM315             | ZNF263    | D88827   | Zinc finger protein 263                                                                                       | 16p13.3       | 0.70            |
| 33404_at   | CAP2               | CAP2      | U02390   | CAP, adenylate cyclase-associated protein, 2 (yeast)                                                          | 6p22.3        | 0.70            |
| 38343_at   | KIAA0328           | ALMS1     | AB002326 | Alstrom syndrome 1                                                                                            | 2p13          | 0.70            |
| 40464_g_at | TRN                | TNPO1     | U70322   | Transportin 1                                                                                                 | 5q13.2        | 0.70            |
| 39931_at   | REDK               | DYRK3     | Y12735   | Dual-specificity tyrosine-(Y)-phosphorylation regulated kinase 3                                              | 1q32.1        | 0.70            |
| 37788_at   | MDC3               | ADAM23    | AF052115 | A disintegrin and metalloproteinase domain 23                                                                 | 2q33          | 0.70            |
| 41355_at   | BCL11A             | BCL11A    | N95229   | B-cell CLL/lymphoma 11A (zinc finger protein)                                                                 | 2p16.1        | 0.69            |
| 32655_s_at | SMAP               | BRD8      | X87613   | Bromodomain containing 8                                                                                      | 5q31          | 0.69            |
| 38994_at   | CIS2; SSI2; Cis    | SOCS2     | AF037989 | Suppressor of cytokine signaling 2                                                                            | 12q           | 0.69            |

| Affy ID    | Synonyms      | Symbol     | Genbank  | Description                                                                                                | Chromosome     | fold difference |
|------------|---------------|------------|----------|------------------------------------------------------------------------------------------------------------|----------------|-----------------|
| 35648_at   | KIAA0442      | AUTS2      | AB007902 | Autism susceptibility candidate 2                                                                          | 7q11.22        | 0.69            |
| 33386_at   | KBL; MGC2305  | GCAT       | Z97630   | 2-amino-3-ketobutyrate-CoA ligase                                                                          | 22q13.1        | 0.69            |
| 31801_at   |               |            | AI808712 | cDNA clone IMAGE:2359688                                                                                   |                | 0.69            |
| 37915_at   | DKFZp434H07   | BAZ2B      | AL080173 | Bromodomain adjacent to zinc finger domain, 2E                                                             | 2q23-q24       | 0.69            |
| 36025_at   | KIAA0337      | P164RHOGEP | AB002335 | Rho guanine nucleotide exchange factor (GEF) 1                                                             | 11q13.4        | 0.69            |
| 36612_at   | KIAA0280      | KIAA0280   | D87470   | KIAA0280 protein                                                                                           | 11q13.4        | 0.69            |
| 33893_r_at | KIAA0470      | KIAA0470   | AB007939 | KARP-1-binding protein                                                                                     | 1q44           | 0.69            |
| 37537_at   | ARFD1         | ARFD1      | L04510   | Tripartite motif-containing 2c                                                                             | 5q12.3         | 0.68            |
| 40215_at   | UGCG          | UGCG       | D50840   | UDP-glucose ceramide glucosyltransferase                                                                   | 9q31           | 0.68            |
| 36059_at   | MEGF7         | LRP4       | AB011540 | Low density lipoprotein receptor-related protein 4                                                         | 11p11.2-p12    | 0.68            |
| 41460_at   | RBM14         | RBM14      | AF080561 | RNA binding motif protein 14                                                                               | 11q13.2        | 0.68            |
| 33427_s_at | ATRN          | ATRN       | AF106861 | Attractin                                                                                                  | 20p13          | 0.68            |
| 32802_at   | MARCH6        | TEB4       | AB011169 | Similar to S. cerevisiae SSM4                                                                              | 5p15.2         | 0.68            |
| 39754_at   | ITGB5         | ITGB5      | X53002   | Integrin, beta 5                                                                                           | 3q21.2         | 0.68            |
| 39845_at   | OMI           | PRSS25     | AF020760 | Protease, serine, 25                                                                                       | 2p12           | 0.68            |
| 36588_at   | KIAA0810      | LINC84A    | AB018353 | Unc-84 homolog A                                                                                           | 7p22.3         | 0.68            |
| 2054_g_at  | NCAD          | CDH2       | M34064   | Cadherin 2, type 1, N-cadherin (neuronal)                                                                  | 18q11.2        | 0.68            |
| 131_at     | TAF11         | TAF11      | X83928   | TATA box binding protein (TBP)-associated factor, 28kD                                                     | 8p21.31        | 0.68            |
| 41000_at   | FOXN3         | CHES1      | U68723   | Checkpoint suppressor 1                                                                                    | 14q24.3-q32.11 | 0.68            |
| 40780_at   | CTBP2         | CTBP2      | AF016507 | C-terminal binding protein 2                                                                               | 10q26.13       | 0.67            |
| 41049_at   | HIRS-1        | IRS1       | S62539   | Insulin receptor substrate 1                                                                               | 2q36           | 0.67            |
| 33932_at   | GST1          | GSPT1      | X17644   | G1 to S phase transition 1                                                                                 | 16p13.1        | 0.67            |
| 844_at     | PPP1R1A       | PPP1R1A    | U48707   | Protein phosphatase 1, regulatory (inhibitor) subunit 1A                                                   | 12q13.2        | 0.67            |
| 36005_at   | SWAP2         | SFRS16     | AF042800 | Splicing factor, arginine/serine-rich 16 (suppressor-of-white-apricot homolog, Drosophila)                 | 19q13.3        | 0.67            |
| 37221_at   | PRKAR2A       | PRKAR2B    | M31158   | Protein kinase, cAMP-dependent, regulatory, type II, beta                                                  | 7q22           | 0.67            |
| 32065_g_at | ICER          | CREM       | S68134   | CAMP responsive element modulator                                                                          | 10p11.21       | 0.67            |
| 39219_at   | IG/EBP-1      | CEBPG      | U20240   | CCAAT/enhancer binding protein (C/EBP), gamma                                                              | 19q13.11       | 0.67            |
| 39135_at   | KIAA0767      | DIP        | AB018310 | KIAA0767 protein; Death-inducing-protein                                                                   | 22q13.31       | 0.67            |
| 41431_at   | KIAA0936      | ICK        | AB023153 | Intestinal cell (MAK-like) kinase                                                                          | 6p12.3-p11.2   | 0.67            |
| 39992_at   | BWR1-A        | SLC22A1L   | AF030302 | Solute carrier family 22 (organic cation transporter), member 18                                           | 11p15.5        | 0.67            |
| 32065_at   | ICER          | CREM       | S68134   | CAMP responsive element modulator                                                                          | 10p11.21       | 0.67            |
| 40411_at   | KIAA0181      | NCOA6      | D80003   | Nuclear receptor coactivator 6                                                                             | 20q11          | 0.67            |
| 40710_at   | CLGN          | CLGN       | D86322   | Calmequin                                                                                                  | 4q28.3-q31.1   | 0.67            |
| 32444_at   | RPL26         | RPL26      | X69392   | Ribosomal protein L26                                                                                      | 17p13          | 0.66            |
| 40151_s_at | PXR1          | PEX5       | Z48054   | Peroxisomal biogenesis factor 5                                                                            | 12p13.3        | 0.66            |
| 40169_at   | TIP47         | M6PRBP1    | AF057140 | Mannose-6-phosphate receptor binding protein                                                               | 19p13.3        | 0.66            |
| 32109_at   | PLM           | FXYD1      | AA524547 | FXYD domain containing ion transport regulator 1 (phospholemmann)                                          | 19q13.1        | 0.66            |
| 34840_at   |               |            | AI700633 | CDNA: FLJ22642 fis, clone HSI0697C                                                                         |                | 0.66            |
| 37650_at   | ZNF127-Xp; RN | MKRN1      | U41315   | Makorin, ring zinc-finger protein; Escapes X chromosome inactivation; Ring zinc-finger protein (ZNF127-Xp) | 7q34           | 0.66            |
| 39838_at   | KIAA0622      | CLASP1     | AB014522 | Cytoplasmic linker associated protein 1                                                                    | 2q14.2-q14.3   | 0.66            |
| 35467_g_at | DJ10          | DNAJB12    | W73046   | DnaJ (Hsp40) homolog, subfamily B, member 12                                                               | 10q22.1        | 0.66            |
| 33800_at   | ADCY9         | ADCY9      | AF036927 | Adenylate cyclase 9                                                                                        | 16p13.3        | 0.66            |
| 41282_s_at | RNF69         | PEX10      | AA194159 | Peroxisome biogenesis factor 10                                                                            | 1p36.32        | 0.65            |
| 38754_at   | COM1          | P8         | AI557295 | P8 protein (candidate of metastasis 1)                                                                     | 16p11.2        | 0.65            |
| 41433_at   | INCAM-100     | VCAM1      | M73255   | Vascular cell adhesion molecule-1                                                                          | 1p32-p31       | 0.65            |
| 38568_at   | TP53BPL       | TOPORS     | U82939   | Topoisomerase I binding, arginine/serine-rich                                                              | 9p21           | 0.65            |
| 32654_g_at | BRD8          | SMAP       | AW020536 | Bromodomain containing 8                                                                                   | 5q31           | 0.65            |
| 36506_at   | AKAP450       | AKAP9      | AJ131693 | A kinase (PRKA) anchor protein (ytiaa) 9                                                                   | 7q21-q22       | 0.65            |
| 37951_at   | DLC-1         | DLC1       | AF035119 | Deleted in liver cancer 1                                                                                  | 8p22           | 0.65            |
| 41789_r_at | KIAA0669      | TSC22D2    | AB014569 | KIAA0669 gene product; TSC22 domain family, member 2                                                       | 3q25.1         | 0.65            |
| 39792_at   | hnRNP-R       | HNRPR      | AF000364 | Heterogeneous nuclear ribonucleoprotein R                                                                  | 1p36.12        | 0.65            |
| 37451_at   | SLC21A11      | SLCO3A1    | AL109695 | Solute carrier organic anion transporter family, member 3A1                                                | 15q26          | 0.65            |
| 32696_at   | PBX3          | PBX3       | X59841   | Pre-B-cell leukemia transcription factor 3                                                                 | 9q33-q34       | 0.65            |
| 35344_at   | KIAA0858      | LMO7       | AB020665 | LIM domain 7                                                                                               | 13q22.2        | 0.65            |
| 39646_at   | MYSB          | CACNB2     | S60415   | Calcium channel, voltage-dependent, beta 2 subunit                                                         | 10p12          | 0.64            |
| 39000_at   | NMT           | NMT1       | AF043324 | N-myristoyltransferase 1                                                                                   | 17q21.31       | 0.64            |
| 35367_at   | CBP35         | IGALS3     | AB006780 | Lectin, galactoside-binding, soluble, 3 (galectin 3)                                                       | 14q21-q22      | 0.64            |
| 34801_at   | USP53         | KIAA0710   | AB014610 | Ubiquitin specific protease 53                                                                             | 12q13.2-q13.3  | 0.64            |
| 40621_at   | PAR-4         | PAWR       | U63809   | PRKC, apoptosis, WT1, regulator                                                                            | 12q21          | 0.64            |
| 39723_at   | CUL1          | CUL1       | AF062536 | Cullin 1                                                                                                   | 7q36.1         | 0.64            |
| 39835_at   | MTMR5         | SBF1       | U93181   | SET binding factor 1                                                                                       | 22q13.33       | 0.64            |
| 38712_at   | CH1           | C1orf9     | AL035291 | Chromosome 1 open reading frame 9                                                                          | 1q24           | 0.64            |
| 38794_at   | NOR-90        | UBTF       | X53390   | Upstream binding transcription factor, RNA polymerase I                                                    | 17q21.3        | 0.64            |
| 36659_at   | FLJ22259      | COL4A2     | X05610   | Collagen, type IV, alpha 2                                                                                 | 13q34          | 0.64            |
| 39295_s_at | ArgBP2a       | ARGBP2     | AF049884 | Arg/Abi-interacting protein ArgBP2                                                                         | 4q35.1         | 0.64            |
| 35824_at   | RP58          | ZNF238     | AJ223321 | RP58 gene                                                                                                  | 1q44-qter      | 0.64            |
| 35741_at   | Pip4k2B       | PIP5K2B    | U85245   | Phosphatidylinositol-4-phosphate 5-kinase, type II, beta                                                   | 17q12          | 0.64            |
| 38364_at   | BCE-1         | TLE4       | AF068197 | Transducin-like enhancer of split 4 (E(sp1) homolog, Drosophila)                                           | 9q21.31        | 0.64            |
| 41791_at   | FLJ21040      | MGC16824   | AC002550 | Esophageal cancer associated protein                                                                       | 16p12.3        | 0.64            |
| 38525_at   | DKFZp564C047  | STAM2      | AF042273 | Signal transducing adaptor molecule (SH3 domain and ITAM motif) 2                                          | 2q23.3         | 0.64            |
| 1269_at    | GRB1          | PIK3R1     | M61906   | Phosphoinositide-3-kinase, regulatory subunit, polypeptide 1 (p85 alpha)                                   | 5q13.1         | 0.64            |
| 41129_at   | KIAA0033      | TMEM41B    | D26067   | KIAA0033 protein; Transmembrane protein 41E                                                                | 11p15.4        | 0.63            |
| 32248_at   | MST107        | PRO2730    | AL045811 | Hypothetical protein PRO2730                                                                               | 3p21.2         | 0.63            |
| 41466_s_at | pH2-52        | ZNF148     | L04282   | Zinc finger protein 14E                                                                                    | 3q21           | 0.63            |
| 38778_at   | KIAA1046      | HSHIN1     | AB028969 | HIV-1 induced protein HIN-1; KIAA1046 protein                                                              | 4q31.21        | 0.63            |
| 38505_at   | AGO2          | EIF2C2     | AL050151 | Eukaryotic translation initiation factor 2C, 2                                                             | 8q24           | 0.63            |
| 34822_at   | ASPP2; 53BP2  | TP53BP2    | U58334   | Tumor protein p53 binding protein, 2                                                                       | 1q42.1         | 0.63            |
| 37999_at   | CPO           | CPO        | D16611   | Coproporphyrinogen oxidase; Carboxypeptidase C                                                             | 2q33.3         | 0.62            |
| 38812_at   | LAMB2         | LAMC1      | X79683   | LAMB2 mRNA for beta2 laminin.                                                                              | 1q31           | 0.62            |
| 34337_s_at | M96           | MTF1       | AJ010014 | Metal response element binding transcription factor 2                                                      | 1p22.1         | 0.62            |
| 36896_s_at | MOP3          | ARNTL      | AF044288 | Aryl hydrocarbon receptor nuclear translocator-like                                                        | 11p15          | 0.62            |
| 38765_at   | Dicer         | DICER1     | AB028449 | Dicer1, Dcr-1 homolog (Drosophila)                                                                         | 14q32.13       | 0.62            |
| 39857_at   | STX11         | STX11      | AF044309 | Syntaxin 11                                                                                                | 6q24.2         | 0.62            |
| 38975_at   | GENX-3414     | GENX3414   | AF062534 | Genethonin 1                                                                                               | 4q24-q25       | 0.61            |
| 35022_at   | L-SOX5        | SOX5       | S83308   | SRY (sex determining region Y)-box 5                                                                       | 12p12.1        | 0.61            |
| 41199_s_at | PSF           | SFPQ       | W27050   | Splicing factor proline/glutamine rich (polypyrimidine tract binding protein associated)                   | 1p34.3         | 0.61            |

| Affy ID    | Synonyms      | Symbol       | Genbank  | Description                                                                               | Chromosome     | fold difference |
|------------|---------------|--------------|----------|-------------------------------------------------------------------------------------------|----------------|-----------------|
| 36538_at   | KIAA0771      | PPP1R13B     | AB018314 | Protein phosphatase 1, regulatory (inhibitor) subunit 13B                                 | 14q32.33       | 0.61            |
| 32070_at   | LPAP; CD45-AP | PTPRCAP      | X97267   | Protein tyrosine phosphatase, receptor type, C-associated protein                         | 11q13.3        | 0.61            |
| 32587_at   | TTIS11D       | ZFP36L2      | U07802   | Zinc finger protein 36, C3H type-like 2                                                   | 2p22.3-p21     | 0.61            |
| 35683_at   | ZCW3          | KIAA0852     | AB020659 | Zinc finger, CW-type with coiled-coil domain 1                                            | 22q12.2        | 0.61            |
| 37312_at   | TRIP-Br2      | SERTAD2      | D50917   | SERTA domain containing 2                                                                 | 2p14           | 0.61            |
| 38001_at   | hHT           | CACNA1C      | L04569   | L-type voltage-dependent calcium channel $\alpha 1$ subunit                               | 12p13.3        | 0.61            |
| 37156_at   | LOC221810     | ETV1         | AF070641 | Hypothetical protein LOC221810                                                            | 7p21.3         | 0.60            |
| 40834_at   | KIAA0300      | PDZ2         | AB002298 | PDZ domain containing 3                                                                   | 5p13.3         | 0.60            |
| 38353_at   | SPBC98        | TUBGCP3      | AF042378 | Tubulin, gamma complex associated protein 3                                               | 13q34          | 0.60            |
| 36956_at   | GLVR2         | SLC20A2      | L20852   | Solute carrier family 20 (phosphate transporter), member 2                                | 8p12-q21       | 0.60            |
| 39286_at   | TOBL          | TOB2         | D64109   | Transducer of ERBB2, 2                                                                    | 22q13.2-q13.31 | 0.60            |
| 39266_at   |               |              | AF070632 | Clone 24405 mRNA sequence                                                                 |                | 0.60            |
| 37698_at   | PRKA1         | AKAP1        | X97335   | A kinase (PRKA) anchor protein 1                                                          | 17q21-q23      | 0.59            |
| 35821_at   | HD3           | HDAC3        | U75697   | Histone deacetylase 3                                                                     | 5q31           | 0.59            |
| 38086_at   | EWI-3         | IGSF3        | AB007935 | Immunoglobulin superfamily, member 3                                                      | 1p13           | 0.59            |
| 38228_g_at | WS2A          | MITF         | AB006909 | Microphthalmia-associated transcription factor                                            | 3p14.2-p14.1   | 0.59            |
| 32405_at   | KIAA0707      | THEA         | AB014607 | Thioesterase, adipose associated                                                          | 1p32.3         | 0.59            |
| 39893_at   | FLJ00058      | GNG7         | AB010414 | Guanine nucleotide binding protein (G protein), gamma 7                                   | 19p13.3        | 0.59            |
| 36633_at   | PKAP10        | AKAP10       | AA114830 | A kinase (PRKA) anchor protein 10                                                         | 17p11.1        | 0.59            |
| 39423_f_at | TEF2          | SPOP         | AJ000644 | Speckle-type POZ protein                                                                  | 17q21.33       | 0.58            |
| 38005_at   | SOV7L         | SLC35D2      | AJ005866 | Solute carrier family 35, member D2                                                       | 9q22.32        | 0.58            |
| 36658_at   | KIAA0018      | DHCR24       | D13643   | 24-dehydrocholesterol reductase                                                           | 1p33-p31.1     | 0.58            |
| 34817_s_at | A2LP          | ATXN2L       | U70671   | Ataxin 2-like                                                                             | 16p11          | 0.58            |
| 33732_at   | mu-ARP2       | APAM1        | Y08387   | Adaptor-related protein complex 4, mu 1 subunit                                           | 7q22.1         | 0.58            |
| 32623_at   | GABA-B R1a    | GABBR1       | AJ225028 | Gamma-aminobutyric acid (GABA) B receptor, 1                                              | 6p21.31        | 0.58            |
| 37661_at   | PMCA1         | ATP2B1       | J04027   | ATPase, Ca <sup>++</sup> transporting, plasma membrane 1                                  | 12q21.3        | 0.58            |
| 32833_at   | CLK           | CLK1         | M59287   | CDC-like kinase 1                                                                         | 2q33           | 0.58            |
| 41747_s_at | ADCAD1        | MEF2A        | U49020   | MADS box transcription enhancer factor 2, polypeptide A (myocyte enhancer factor 2A)      | 15q26          | 0.57            |
| 34280_at   | GABRE         | GABRE        | Y09765   | Gamma-aminobutyric acid (GABA) A receptor, epsilon                                        | Xq28           | 0.57            |
| 38175_at   | KIAA0667      | TIP120B      | AB014567 | TBP-interacting protein                                                                   | 3p25.2         | 0.57            |
| 34396_at   | KIAA0978      | ASXL1        | AB023195 | Additional sex combs like 1 (Drosophila)                                                  | 20q11.1        | 0.57            |
| 1137_at    | GLVR2         | SLC20A2      | L20852   | Solute carrier family 20 (phosphate transporter), member 2                                | 8p12-q21       | 0.56            |
| 41329_at   | FLJ10706      | PACE-1       | AH458463 | Ezrin-binding partner PACE-1                                                              | 1q24.2         | 0.56            |
| 35705_at   | RVR           | NR1D2        | D16815   | Nuclear receptor subfamily 1, group D, member 2                                           | 3p24.2         | 0.56            |
| 31526_f_at | TRE2          | USP6         | X63547   | Ubiquitin specific protease 6 (Tre-2 oncogene)                                            | 17q11          | 0.56            |
| 38894_g_at | P40PHOX       | NCF4         | AL008637 | Neutrophil cytosolic factor 4                                                             | 22q13.1        | 0.56            |
| 36507_at   | HUB1          | ZNF282       | D30612   | Zinc finger protein 282                                                                   | 7q35-q36       | 0.56            |
| 39307_s_at | LCB           | CLTB         | X81637   | Clathrin light chain 1                                                                    | 5q35           | 0.56            |
| 38793_at   | Troponin T    | TNNT2        | X74819   | Troponin T2, cardiac                                                                      | 1q32           | 0.56            |
| 31843_at   | KIAA0832      | ESRRG        | AB020639 | Estrogen-related receptor gamma                                                           | 1q41           | 0.56            |
| 38072_at   | DJ465N24.2.1  | DJ465N24.2.1 | AL031432 | Cone RP3-465N24 on chromosome 1p35.1-36.13                                                | 1p35.1-p36.13  | 0.56            |
| 35208_at   | KIAA0874      | ANKRD12      | AB020681 | Ankyrin repeat domain 12                                                                  | 18p11.22       | 0.55            |
| 40008_at   | SCYA11        | CCL11        | U48573   | Chemokine (C-C motif) ligand 11                                                           | 17q21.1-q21.2  | 0.55            |
| 34018_at   | COL19A1L      | COL19A1      | D38183   | Collagen, type XIX, alpha 1                                                               | 6q12-q13       | 0.55            |
| 32630_s_at | ATX           | SMG1         | AI610467 | PI-3-kinase-related kinase SMG-1                                                          | 16p12.3        | 0.55            |
| 39760_at   | QK3           | QK1          | AL031781 | Quaking homolog, KH domain RNA binding (mouse)                                            | 6q26-27        | 0.55            |
| 32167_at   | MPPB          | PMPCB        | AF054182 | Peptidase (mitochondrial processing) beta                                                 | 7q22-q32       | 0.55            |
| 748_s_at   | MXD2          | MXI1         | D63940   | MAX interactor 1                                                                          | 10q24-q25      | 0.55            |
| 35314_at   | KIAA0159      | CNAP1        | D63880   | Chromosome condensation-related SMC-associated protein 1                                  | 12p13.3        | 0.54            |
| 558_at     | KRT1A         | KRT1         | M98776   | Keratin 1                                                                                 | 12q12-q13      | 0.54            |
| 37208_at   | CO9           | PSPHL        | AJ001612 | Phosphoserine phosphatase-like                                                            | 7q11.2         | 0.54            |
| 33290_at   | MGC71303      | INPP5B       | M74161   | Inositol polyphosphate-5-phosphatase, 75kD                                                | 1p34           | 0.54            |
| 857_at     | PP2Calpha     | PPM1A        | S87759   | Protein phosphatase 1A (formerly 2C), magnesium-dependent, alpha isoform                  | 14q23.1        | 0.54            |
| 39971_at   | LYL1          | LYL1         | M22637   | Lymphoblastic leukemia derived sequence 1                                                 | 19p13.2        | 0.53            |
| 39041_at   | PDC-E2        | DLAT         | Y00978   | Dihydrolipoamide S-acetyltransferase (E2 component of pyruvate dehydrogenase complex)     | 11q23.1        | 0.53            |
| 32129_at   | RNF115        | ZNF364       | AL079314 | Zinc finger protein 364                                                                   | 1q21.1         | 0.52            |
| 38886_i_at | ARHI          | DIRAS3       | U96750   | Ras homolog gene family, member 3                                                         | 1p31           | 0.52            |
| 33240_at   | KIAA1095      | SEMACAP3     | AB029018 | PDZ domain containing RING finger 3                                                       | 3p13           | 0.52            |
| 41683_i_at | E1B           | BCKDHB       | U50708   | Branched chain keto acid dehydrogenase E1, beta polypeptide (maple syrup urine disease)   | 6q13-q15       | 0.51            |
| 33253_at   | KIAA0129      | TRIM14       | D50919   | Tripartite motif-containing 14                                                            | 9q22.33        | 0.51            |
| 142_at     | hTAFII130     | TAF4         | U75308   | TAF-4 RNA polymerase II, TATA box binding protein (TBP)-associated factor, 135kDa         | 20q13.33       | 0.51            |
| 40217_s_at | CDS           | CDS1         | U65887   | CDP-diacylglycerol synthase (phosphatidate cytidyltransferase) 1                          | 4q21.23        | 0.50            |
| 41788_i_at | KIAA0669      | TSC22D2      | AB014569 | TSC22 domain family, member 2                                                             | 3q25.1         | 0.50            |
| 39681_at   | ZNF145        | ZBTB16       | AF060568 | Kruppel-like zinc finger protein; Promyelocytic leukemia zinc finger protein (PLZF) gene. | 11q23.1        | 0.50            |
| 32961_at   | IRLB          | MYCPBP       | X63417   | C-myc promoter binding protein                                                            | 15q22.31       | 0.50            |
| 41503_at   | KIAA0854      | KIAA0854     | AB020661 | Zinc fingers and homeoboxes 2                                                             | 8q24.13        | 0.50            |
| 35209_at   | KIAA0766      | EPM2AIP1     | AB018309 | EPM2A (Iafarin) interacting protein 1                                                     | 3p22.1         | 0.49            |
| 39827_at   | RTP801        | DDIT4        | AA522530 | DNA-damage-inducible transcript 4                                                         | 10pter-q26.12  | 0.49            |
| 34355_at   | MeCP2         | MECP2        | AJ132917 | Methyl CpG binding protein 2 (Rett syndrome)                                              | Xq28           | 0.49            |
| 39223_at   | FLJ46354      | FLJ46354     | AL096749 | FLJ46354 protein                                                                          | 1p32.3         | 0.48            |
| 40046_f_at | C18orf1       | C18orf1      | AF009426 | Chromosome 18 open reading frame 1                                                        | 18p11.2        | 0.48            |
| 32556_at   | U2AF65        | U2AF65       | X64044   | U2 (RNU2) small nuclear RNA auxiliary factor 1                                            | 19q13.42       | 0.47            |
| 40218_at   | CDS           | CDS1         | U60808   | CDP-diacylglycerol synthase 1                                                             | 4q21.23        | 0.47            |
| 38599_s_at | XAP-5         | DXS9928E     | AD001530 | DNA segment on chromosome X                                                               | Xq28           | 0.46            |
| 1052_s_at  | NF-IL6-beta   | CEBPD        | M83667   | NF-IL6-beta protein                                                                       | 8p11.2-p11.1   | 0.45            |
| 35303_at   | INSIG1        | INSIG1       | U98676   | Insulin induced protein 1                                                                 | 7q36           | 0.44            |
| 41685_at   | KIAA0752      | KIAA0752     | AB018295 | NY-REN-7 antigen                                                                          | 5q35.3         | 0.42            |
| 32127_at   | BICD          | BICD1        | U90030   | Bicaudal D homolog 1                                                                      | 12p11.2-p11.1  | 0.41            |
| 34843_at   | KIAA0222      | ZNF516       | AL044599 | Zinc finger protein 516                                                                   | 18q23          | 0.41            |
| 36739_at   | PDK4          | PDK4         | U54617   | Pyruvate dehydrogenase kinase, isoenzyme 4                                                | 7q21.3-q22.1   | 0.37            |
| 36680_at   | AMY2B         | AMY2B        | M24895   | Amylase, alpha 2B; pancreatic                                                             | 1p21           | 0.37            |
| 36575_at   | BL34          | RGS1         | S59049   | Regulator of G-protein signalling 1                                                       | 1q31           | 0.33            |
| 36254_at   | TAC1          | TAC1         | U37529   | Tachykinin, precursor 1 (substance K, substance F)                                        | 7q21-q22       | 0.26            |
| 41260_at   | P72           | DDX17        | U59321   | DEAD (Asp-Glu-Ala-Asp) box polypeptide 17                                                 | 22q13.1        | 0.20            |
